# Supplementary material
Source: PubMed Central journal article supplement (PMC3145723)
Supplement: 1105467108_pnas.201105467SI.pdf [file 1105467108_pnas.201105467SI.pdf]

# Supporting Information

Rabeling et al. 10.1073/pnas.1105467108

## SI Materials and Methods

**Population-Genetic Analyses. Population sampling.** The known distribution range of *Mycocarpus smithii* includes Latin America from northern Mexico to northern Argentina and many Caribbean islands (1–6). To test for asexuality in *M. smithii*, we sampled populations throughout the geographic range between 2003 and 2010 (Table S1). Previous studies demonstrated that *M. smithii* colonies could be either mono- or polygynous, meaning that a single colony could include either a single or multiple reproductively active queens (7–9). Preliminary genotyping of sampled individuals revealed that in some populations more than a single multilocus genotype was present; however, queen and offspring genotypes were genetically identical. Hence, our working hypothesis was that *M. smithii* queens produce workers and queens clonally, either via apomixis or automixis. We attempted to sample entire colonies of *M. smithii* through careful nest excavations, including whenever possible workers, brood, and a reproductively active queen(s). In addition to nest excavations, workers were collected from nest entrances. Scooping up nest entrances with a knife proved to be an efficient way to collect workers because foragers accumulate in a tiny circular chamber below the entrance (7, 10).

**Microsatellite development.** To characterize *M. smithii* colonies and populations genetically, we developed 12 highly variable short tandem repeat markers (microsatellites). For microsatellite development, genomic DNA was extracted from ~100 *M. smithii* workers collected from a single population in Rio Claro, Brazil, with a QIAamp DNA Micro Kit (QIAGEN) to obtain ~100 µg DNA. Genetic Identification Services enriched microsatellite libraries for four different motifs in parallel: CA, GA, AAC, and ATG. Pooled genomic DNA was partially restricted with the enzymes RsaI, HaeIII, BsrB1, PvuII, StuI, ScaI, and EcoRV. Size-selected fragments (300–750 bp) were linked to adapters containing a HindIII restriction site and then captured with magnetic beads. Fragments were ligated into the HindIII site of the plasmid pUC19. Plasmids were propagated in *Escherichia coli* DH5α and stored in 20% glycerol at –80 °C. Cells from the glycerol stock were spread on X-gal/isopropyl-β-D-thiogalactoside/ampicillin plates, picked after incubation, and heated to 100 °C for 10 min in 10 µL PCR Master Mix (1× PCR buffer, 30 nmol MgCl<sub>2</sub>, 3 nmol each dNTP, 15 pmol M-13 cloning-site primers). Five microliters of polymerase solution (0.075 µL, 5 U Taq DNA polymerase, 0.5 µL 10× PCR buffer, 4.425 µL ddsH<sub>2</sub>O) were added to amplify the insert using a PTC-200 Cyclor (MJ Research) (94 °C for 3 min; 35 cycles of 94 °C for 40 s, 55 °C for 40 s, 72 °C for 30 s; 72 °C for 4 min). Overall, 100 PCR products (25 for each of the CA, GA, AAC, and ATG libraries) were sequenced on an Applied Biosystems 3100 Genetic Analyzer using BigDye Terminator chemistry.

Twelve loci were chosen to represent a variety of variable repeat motifs, variable product sizes, and similar annealing temperatures, and were combined in four multiplex polymerase chain reactions (Table S7). Specific primers were designed with an optimal annealing temperature ( $T_m$ ) of 56–58 °C, a GC content of ~50%, and at least one GC clamp using the Primer3 web site (11).

**Genotyping.** DNA of single workers, queens, and spermatheca contents was extracted using a 10% Chelex solution (Sigma-Aldrich). Spermatheca contents were extracted following the methodology outlined in Rabeling et al. (8). One microliter of DNA extract was used per 10 µL PCR and amplified using the following conditions: 95 °C for 5 min; 35 cycles of 94 °C for 30 s, 55 °C for 90 s, 72 °C for 60 s; 72 °C for 10 min. Using the multiplex

PCR, we examined allelic variation within each locus by genotyping 1,930 *M. smithii* samples, yielding a total of 106 alleles across the 12 loci (range = 2–15 alleles per locus; Table S7). The number of alleles per locus per individual never exceeded two, indicating that *M. smithii* females are diploid. Representatives of each multilocus genotype were genotyped twice, using the same DNA extract, and scored blindly to minimize the possibility of erroneously assigning incorrect genotypes to the individuals.

For fragment analysis, 1 µL of PCR product was mixed with 8 µL of HiDi (Applied Biosystems) and 1.5 µL of cheaply amplified size standards using the following primer/ladder sizes: ROX F1, ROX 104, ROX 150, ROX 200, ROX 253, ROX 305, and ROX 424 (12). PCR products were analyzed on an Applied Biosystems 3100 Genetic Analyzer and alleles were scored using GeneScan v3.5 (Applied Biosystems) and GeneMarker v1.5 (SoftGenetics).

**Statistical analyses.** The goals of the population-genetic analyses were to determine (i) whether *M. smithii* is obligately or facultatively asexual, (ii) the cytogenetic mechanism underlying parthenogenesis in reproductive females, and (iii) the genetic structure and diversity within and among asexual and sexual colonies and populations. According to preliminary analyses performed on laboratory and field colonies, our hypothesis was that workers and queens of a single colony exhibited repeated multilocus genotypes (MLGs). The genotype-to-individual ratio (G:N ratio) is a simple measure for identifying clonality, with ratios ranging from 0 to 1 (13). A value close to 0 is characteristic of a strictly clonal colony/population in which all individuals share the same genotype, whereas a value of 1 is characteristic of a population in which all individuals have distinct genotypes, as expected under sexual reproduction and genetic recombination (Table S1). Because ants are social insects and live in colonies, we devised a second, colony-level measure of asexuality: the genotype-to-colony (G:C) ratio (the number of genotypes observed divided by the number of colonies screened). A value of 1 indicates that a single multilocus genotype was identified in each colony and all colonies were different from each other, as expected under clonal reproduction by a single queen; values between 0 and 1 indicate some sharing of genotypes between different colonies; and values greater than 1 indicate increased genetic diversity within colonies, suggesting either the presence of multiple genetically distinct reproductives in a colony or genetic recombination (Table S1).

Scoring repeated multilocus genotypes of multiple colonies per population revealed that MLGs could differ by only a single allele. These minor differences could either be due to “somatic” mutations or to scoring errors or, alternatively, slightly different MLGs could represent independent asexual lineages that originated separately from a sexually reproducing ancestral population (14) (Table S3). We therefore distinguished between slightly different MLGs belonging to the same asexual lineage, or clone, and slightly different MLGs that belong to the same clone and arose via mutations or scoring errors (13, 14). First, as recommended in Arnaud-Haond et al. (14), we identified MLG pairs in asexual populations with very low genetic distances, as indicated by a small peak in the frequency distribution of genetic distances. Then we calculated  $p_{\text{sex}}$  (equation 3 in ref. 14) using the software GENCLONE 2.0 (15) to estimate the probability that identical multilocus genotypes arose from independent sexual events or that they belonged to the same clone. If the probability was lower than the implemented threshold value ( $\alpha = 0.01$ ), then identical MLGs were regarded as belonging to the same asexual lineage or clone. In our analysis, we first excluded all identical MLGs, re-

sulting in a total of 57 unique MLGs. Of those 57 MLGs, 11 MLG pairs differed by only a single allele, reducing the number of independently derived asexual lineages to 46. Increasing the allele difference between MLG pairs to 2, 3, 4, 5, and 6 alleles further reduced the number of independently originated clones to 43, 41, 40, 39, and 38 clones, respectively.

Interestingly, seven MLG pairs, all of which came from colonies collected in the same population, differed only at a single locus in which one lineage was homozygous for a given locus and the other lineage was heterozygous (Table S3; Panchan B and C, Copan A and B, Remate A and B and Tikal A, Ocumare B and D, Ocumare B and C, Amigos A and C, Cuevas C and Simla B and C). Currently, we cannot distinguish whether this difference represents a transition from heterozygosity to homozygosity, which would be expected under automixis with central fusion and low recombination rates (16, 17), or whether it represents a case of gene conversion in an apomictic lineage.

We also measured the inbreeding coefficient of *M. smithii* colonies/populations, describing the maximum deviation from random mating and calculated as  $F_{IS} = H[\text{bar}]_e - H[\text{bar}]_o / H[\text{bar}]_e$  (13, 14, 18, 19), using the software package Genetic Data Analysis (GDA) (20). Observed heterozygosity ( $H_o$  = number of heterozygosities/ $N$ ) and expected heterozygosity [ $H_e = 1 - \sum p_i^2$ ] were calculated using the software GENALEX 6 (21).  $F$  statistics and heterozygosities were calculated for each MLG and for each recombinant population separately. To avoid resampling of identical MLGs in recombinant populations, we included only a single representative of each genotype. The analysis of molecular variance was calculated with GENALEX 6 (21). Clonal diversity was calculated as  $R = (G - 1)/(N - 1)$ , with  $G$  representing the number of asexual lineages, or clones, and  $N$  representing the number of sampled multilocus genotypes (14).

To reveal the underlying population-genetic structure of sexual and asexual populations, we used a number of multivariate statistical methods (22, 23). Nonmetric multidimensional scaling (NMDS) analyses were used to identify the presence of genetic clusters. In GDA (20), we transformed the genetic variability described by the microsatellite data into a matrix of pairwise Nei's 1972 standard genetic distances (20, 24). The distance matrix was then used to identify clusters that best describe the observed genetic variability in a few dimensions (22, 25–27) using the software PERMAP 11.6 (28). To find a global minimum mapping solution, we used non-metric ratio and error bounds with a 5% error bound, set the convergence rate control to small step size, and set the convergence limit control to high precision. The analysis was carried out for three dimensions. The 3D distribution of object coordinates was visualized with the software SYSTAT (Systat Software). To determine whether visually identified genetic clusters were significantly different from one another, we used a discriminate analysis of principal components (DAPC) (23) using SYSTAT. In addition, a principal component analysis (PCA) was used to cluster genotypes by genetic similarity, which was 77.55% for the first three principal components (first PC: 45.57%; second PC: 19.48%; third PC: 12.5%).

**Breeding experiment.** To provide experimental evidence for the cytogenetic mechanism underlying parthenogenetic reproduction, we conducted a laboratory breeding experiment. Six generations of reproductively active queens ( $n = 93$ ) collected in 2001 in Gamboa, Panama, were raised in laboratory nests over a period of ~1 y (see ref. 29 for a description of the nest setup). Initially, we selected 30 alate virgin queens (five individuals from six colonies) for the breeding experiment. The queens' wings were removed, a procedure known to stimulate reproductive behavior. Each queen was provided with a piece of fungus garden, which was carefully screened to exclude existing eggs and larvae, and 10 sterile workers were added to each colony. As soon as the experimental colonies started producing sexual offspring (i.e., the next generation of virgin queens), those new gynes were separated

to initiate the next generation of experimental colonies. After raising six generations of reproductive females from multiple maternal lineages, we genotyped all reproductive and alate queens using the microsatellites described above. All 93 individuals were genetically identical, representing the multilocus genotype Gamboa A (Tables S1, S2, and S3). Transitions from hetero- to homozygosity were not identified at any locus. Even though workers in laboratory and field colonies were never found to have functional ovaries (8), we dissected a subset of workers from the experimental colonies to determine whether workers contribute to colony reproduction. No worker reproduction was detected.

**Phylogenetic Analyses. Taxon sampling.** To test the monophyly of *M. smithii* and to infer intraspecific relationships between asexual and sexual populations, we conducted phylogenetic analyses of two distinct datasets. First, we analyzed a global dataset that included 84 *Mycocepurus* ingroup taxa, 32 of them *M. smithii* (Table S5), and 61 non-*Mycocepurus* attines, plus 26 nonattine myrmicine outgroups. The recently described social parasite *M. castrator* (30) was not included in this analysis. Second, we conducted a local ingroup-only analysis including 41 *M. smithii* taxa representing one individual from each of the genotyped populations (Table S5).

**DNA sequencing.** Given the small size of *Mycocepurus* workers, DNA was extracted from entire single specimens. For queens, only the mesosomas were extracted, using a QIAamp DNA Micro Kit (QIAGEN), diluting the extracted DNA in 40  $\mu$ L ddH<sub>2</sub>O. For the global dataset, we analyzed an alignment including a total of 2,319 bp, consisting of fragments from three single-copy nuclear genes—Elongation Factor 1- $\alpha$  F1 copy (EF1- $\alpha$ ; 1,071 bp), Wingless (Wg; 405 bp), and Long Wavelength Rhodopsin (LW Rh; 456 bp)—and one mitochondrial gene—Cytochrome Oxidase I (COI; 387 bp). All data represent protein-coding (exon) sequences; introns of EF1- $\alpha$ , Wg, and LW Rh were excluded from the phylogenetic analysis because they could not be aligned confidently across ingroup and outgroup taxa. All ingroup sequence data were generated for this study; they do not contain missing fragments, except for the LW Rh sequence of *M. goeldii* 278, and were deposited in GenBank (Table S5). The outgroup sequences were acquired from published information (31) and lacked DNA sequence information for COI. The global alignment (including all in- and outgroup taxa) included 909 variable nucleotide positions of which 860 were parsimony-informative (Table S6).

For the local, *M. smithii*-only alignment, we obtained 1,515 bp of the 3' section of the mitochondrial COI gene (1,173 bp), the t-RNA leucine region (t-RNA Leu; 72 bp), and the 5' section of the Cytochrome Oxidase II gene (COII; 270 bp). The non-transcribed intergenic spacer, present in some other Attini (32), consists of the triplet TTA in *M. smithii*. All sequence data were translated into amino acid sequences to test for the presence of mitochondrial pseudogenes ("numts"), which have been reported in some Attini (33). The alignment contained 248 informative sites of which 169 were parsimony-informative (Table S6). Primers were modified from several sources and specifically designed for this study (Table S8). DNA sequences were aligned manually in MacClade v4.08 (34). The mitochondrial phylogram was studied both as an unrooted network and as a midpoint-rooted tree because a long branch separates the ingroup from the sister species of *M. smithii*, rendering the correct rooting of the *M. smithii* mitochondrial tree a difficult problem.

**Data partitioning.** Based on genes and on the variability of codon-position sites within each gene, following the recommended methodology outlined in Ward et al. (35), we partitioned the global dataset into 10 partitions: (i) first and second codon position of EF1- $\alpha$ , (ii) third position of EF1- $\alpha$ ; (iii–v) first, second, and third positions of Wg; (vi–viii) first, second, and third positions of LW Rh; (ix) first and second position of COI, and (x) third

position of COI (Table S6). Best-fit models of sequence evolution were selected for each partition under the Akaike information criterion (AIC) (36) and hierarchical likelihood ratio tests (hLRTs) as calculated in MODELTEST v3.7 (37) (Table S6). When different models of sequence evolution were chosen by AIC and hLRT, the more complex model was implemented.

The local, *M. smithii*-only alignment was divided into two partitions. The first partition included the first and second positions of COI and COII and the tRNA leucine region; the second partition included the third positions of COI and COII (Table S6).

**Bayesian phylogenetic inference.** We conducted partitioned Bayesian analyses using MrBayes v3.1.2 (38) with nucmodel = 4by4 and samplefreq = 500. All parameters, including branch-length rate multipliers, were unlinked across partitions except branch lengths and topology. All analyses were carried out using parallel processing (one chain per central processing unit) with eight chains per run and two runs per analysis (nruns = 2).

To address known problems with branch-length estimation in MrBayes (for example, 35, 39–42), we reduced the branch-length priors. In the global analyses, we used brlenspr = unconstrained:Exp(133.6081222) based on the procedure suggested in Brown et al. (39); in the local analyses, we set brlenspr = unconstrained:Exp(100). For the global analyses, moderately informative Dirichlet priors were specified for branch-length rate multipliers to reflect differences in evolutionary rates between first and second codon positions versus third codon position and between nuclear and mitochondrial genes. In local analyses, which used only two partitions, we set prset ratepr = variable. In both sets of analyses, we used the props command to increase the proposal rate from 1,000 to 10,000 and to decrease the Dirichlet alpha parameter from 500 to 250 for the rate multipliers (proposal mechanism 26 in MrBayes).

Burn-in and convergence were assessed using Tracer v1.5 (43) by examining potential scale reduction factor values in the MrBayes.stat output files, and by using Bayes factor comparisons of marginal likelihoods of pairs of runs in Tracer, which employs the weighted likelihood bootstrap estimator of Newton and Raftery (44) as modified by Suchard et al. (45), with SE estimated using 1,000 bootstrap pseudoreplicates.

**Maximum likelihood analyses.** Partitioned maximum likelihood (ML) analyses were carried out in GARLI 0.97.r737 (46) using parallel processing.

**ML bootstrap analyses:** For the global dataset, ML bootstrap analyses consisted of 1,000 pseudoreplicates; for the local dataset 1,500 pseudoreplicates, both deviating from default settings as follows: genthreshfortopterm = 5000; scorethreshforterm = 0.10; startoptprec = 0.5; minoptprec = 0.01; numberofprecreductions = 1; treerejectionthreshold = 20.0; topoweight = 0.01; brlenweight = 0.002.

**ML “best-tree” analyses:** For both the global and local datasets, ML best-tree analyses consisted of 100 searches, deviating from the default settings as follows: topoweight = 0.01; brlenweight = 0.002. The best tree for the global analysis had a score of  $\ln L = -22,005.643$ ; for the local analysis,  $\ln L = -5,141.168$ .

In all analyses, the value for modweight was calculated as  $0.0005 \times (\text{number of subsets} + 1)$  (46).

**Constraint analyses.** To test for single versus multiple independent origins of asexuality, sexual and asexual populations were topologically constrained to occupy the opposite sides of a single branch in constrained ML and Bayesian analyses of the ingroup-only mitochondrial data. The marginal likelihoods of the resulting phylogenies were compared with those obtained in unconstrained analyses using Bayes factors (47–50). Bayes factors (BF) were calculated as the ratio of marginal likelihoods from constrained versus unconstrained analyses (i.e., the differences in  $-\ln L$ ) to

produce the test statistic  $2\ln(\text{BF})$ . In the case of the ML analysis comparison, the marginal likelihoods used were point estimates from best-tree analyses as described above; for Bayesian analyses, they were post-burn-in harmonic means of the sampled likelihoods (48, 49, 51) estimated in Tracer v1.5 (43), which employs the weighted likelihood bootstrap estimator of Newton and Raftery (44) as modified by Suchard et al. (45), with SE estimated using 1,000 bootstrap pseudoreplicates. Within the Bayesian statistical framework (47), the resulting test statistics, 137.82 (ML) and 124.1 (Bayesian), indicate that the constrained topologies are significantly worse fitting to the data than the unconstrained topologies, thus providing additional support to a hypothesis of multiple origins of asexuality in *M. smithii*.

**Divergence-dating analysis.** We used a Bayesian relaxed clock uncorrelated lognormal approach implemented in the program BEAST v1.4.8 with a Yule process as the tree prior (52–54). As the model of sequence evolution, we used GTR+I+ $\Gamma$  with three partitions (codons 1, 2, and 3). To provide identical gene sampling for in- and outgroup taxa, the mitochondrial DNA sequence data were excluded from the divergence-dating analysis and only the nuclear DNA data were retained. Substitution model, rate heterogeneity, and base frequencies were unlinked across codon positions. The root node was assigned to the so-called core myrmicines, a well-supported clade identified in Brady et al. (55), and three taxa, one *Hylomyrma* (note: *Hylomyrma* was erroneously named *Pogonomymex* in ref. 31) and two *Myrmica* species, were used to root the tree. According to the estimates obtained by Brady et al. (55), the root node was given a normal age prior distribution (mean = 73.5, SD = 4.5). Lognormal age prior distributions were assigned to three internal nodes, the *Apterostigma pilosum*-complex stem group (mean = 2.7, SD = 0.3, zero offset 15.0), the *Cyphomyrma rimosus* stem group (mean = 2.2, SD = 0.5, zero offset 15.0), and the *Trachymyrma* stem group (mean = 1.5, SD = 0.5, zero offset 15.0), taking into account fungus-growing ant fossils and following the methodology outlined in Schultz and Brady (31). Two fossils, *Trachymyrma primaevus* and a putative leafcutter ant fossil depicted in Grimaldi and Engel (56), were not included in our analysis because the placement of these fossils within the tribe Attini is uncertain (31). Markov chain Monte Carlo runs were run for 10 million generations, and the first 1 million generations were discarded as burn-in. Searches achieved sufficient mixing, as indicated by high effective sample size values for all parameters, by plateaus in divergence time estimates over generations after burn-in, and by repeatability of results over 10 independent runs. The results from all independent runs were combined in Tracer v1.5 and reported as mean values  $\pm$  95% upper and lower boundaries (43).

To use consistent in- and outgroup taxon sampling and to prevent estimating disproportionately old root nodes for the ingroup clades, only a single representative of each *Mycocepurus* species was used during the divergence-dating analysis, except for *M. smithii*, for which two genetically divergent individuals were included to estimate the crown-group age (i.e., most recent possible origin) for the species. In addition, to test whether the mitochondrial sequence data (present for the *Mycocepurus* ingroup but not for the outgroup taxa) had an effect on the outcome of the divergence-dating analyses, 10 parallel runs were executed, including and excluding COI sequences. The divergence estimates of the root node and internal nodes were significantly older for the dataset including mitochondrial sequence data. Hence, the mitochondrial data were discarded for our final divergence-dating analysis, and only the sequence information for single-copy nuclear genes was retained, providing identical gene sampling for in- and outgroup taxa.

1. Wheeler WM (1907) The fungus-growing ants of North America. *Bull Am Mus Nat Hist* 23:669–807.
2. Kempf W (1963) A review of the ant genus *Mycocepurus* Forel, 1893 (Hymenoptera: Formicidae). *Stud Entomol* 6:417–432.
3. Kempf WW (1972) Catálogo abreviado das formigas da região Neotropical. *Stud Entomol* 15:3–344.
4. Weber NA (1972) *Gardening Ants. The Attines* (Memoirs Am Philos Soc, Philadelphia).
5. Brandão CRF (1991) Adendos ao catálogo abreviado das formigas da região Neotropical (Hymenoptera: Formicidae). *Rev Bras Entomol* 35:319–412.
6. Mackay WP, Maes JM, Rojas Fernández P, Luna G (2004) The ants of North and Central America: The genus *Mycocepurus* (Hymenoptera: Formicidae). *J Insect Sci* 4:27.
7. Rabeling C, Verhaagh M, Engels W (2007) Comparative study of nest architecture and colony structure of the fungus-growing ants, *Mycocepurus goeldii* and *M. smithii*. *J Insect Sci* 7:40.
8. Rabeling C, et al. (2009) Thelytokous parthenogenesis in the fungus-gardening ant *Mycocepurus smithii* (Hymenoptera: Formicidae). *PLoS One* 4:e6781.
9. Eidmann H (1936) Ökologisch-faunistische Studien an südbrasilianischen Ameisen. *Arb Physiol Angew Entomol Berlin-Dahlem* 3:81–114.
10. Fernández-Marín H, Zimmermann J, Wcislo W, Rehner S (2005) Colony foundation, nest architecture and demography of a basal fungus-growing ant, *Mycocepurus smithii* (Hymenoptera, Formicidae). *J Nat Hist* 39:1735–1743.
11. Rozen S, Skaletsky H (2000) Primer3 on the WWW for general users and for biologist programmers. *Methods Mol Biol* 132:365–386.
12. DeWoody JA, et al. (2004) Universal method for producing ROX-labeled size standards suitable for automated genotyping. *Biotechniques* 37:348–352.
13. Halkett F, Simon JC, Balloux F (2005) Tackling the population genetics of clonal and partially clonal organisms. *Trends Ecol Evol* 20:194–201.
14. Arnaud-Haond S, Duarte CM, Alberto F, Serrão EA (2007) Standardizing methods to address clonality in population studies. *Mol Ecol* 16:5115–5139.
15. Arnaud-Haond S, Belkhir K (2007) GENCLONE: A computer program to analyse genotypic data, test for clonality and describe spatial clonal organization. *Mol Ecol Notes* 7:15–17.
16. Pearcy M, Hardy O, Aron S (2006) Thelytokous parthenogenesis and its consequences on inbreeding in an ant. *Heredity* 96:377–382.
17. Rey O, et al. (March 31, 2011) Meiotic recombination dramatically decreased in thelytokous queens of the little fire ant and their sexually produced workers. *Mol Biol Evol*, 10.1093/molbev/msr082.
18. Balloux F, Lehmann L, de Meeüs T (2003) The population genetics of clonal and partially clonal diploids. *Genetics* 164:1635–1644.
19. De Meeüs T, Balloux F (2005) F-statistics of clonal diploids structured in numerous demes. *Mol Ecol* 14:2695–2702.
20. Lewis P, Zaykin D (2002) GDA (Genetic Data Analysis). <http://hydrodictyon.eeb.uconn.edu/people/plewis/software.php>.
21. Peakall R, Smouse PE (2006) GENALEX 6: Genetic analysis in Excel. Population genetic software for teaching and research. *Mol Ecol Notes* 6:288–295.
22. Jombart T, Pontier D, Dufour AB (2009) Genetic markers in the playground of multivariate analysis. *Heredity* 102:330–341.
23. Jombart T, Devillard S, Balloux F (2010) Discriminant analysis of principal components: A new method for the analysis of genetically structured populations. *BMC Genet* 11: 94.
24. Nei M (1972) Genetic distance between populations. *Am Nat* 106:283–292.
25. Lessa EP (1990) Multidimensional analysis of geographic genetic structure. *Syst Biol* 39:242–252.
26. Novembre J, Stephens M (2008) Interpreting principal component analyses of spatial population genetic variation. *Nat Genet* 40:646–649.
27. Ross KG, Gotzke D, Ascunce MS, Shoemaker DDW (2010) Species delimitation: A case study in a problematic ant taxon. *Syst Biol* 59:162–184.
28. Heady R, Lucas J (2007) PERMAP: Perceptual MAPPING Software (Univ of Louisiana at Lafayette). <http://www.ucs.louisiana.edu/~rbh8900>.
29. Schultz T (1993) Stalking the wild attine. *Notes Undergr* 8:7–10.
30. Rabeling C, Bacci M (2010) A new workerless inquiline in the Lower Attini (Hymenoptera: Formicidae), with a discussion of social parasitism in fungus-growing ants. *Syst Entomol* 35:379–392.
31. Schultz TR, Brady SG (2008) Major evolutionary transitions in ant agriculture. *Proc Natl Acad Sci USA* 105:5435–5440.
32. Wetterer JK, Schultz TR, Meier R (1998) Phylogeny of fungus-growing ants (Tribe Attini) based on mtDNA sequence and morphology. *Mol Phylogenet Evol* 9:42–47.
33. Martins J, Jr, et al. (2007) Nuclear mitochondrial-like sequences in ants: Evidence from *Atta cephalotes* (Formicidae: Attini). *Insect Mol Biol* 16:777–784.
34. Maddison DR, Maddison WP (2000) *MacClade 4* (Sinauer, Sunderland, MA).
35. Ward PS, Brady SG, Fisher BL, Schultz TR (2010) Phylogeny and biogeography of dolichoderine ants: Effects of data partitioning and relict taxa on historical inference. *Syst Biol* 59:342–362.
36. Posada D, Crandall KA (2001) Selecting the best-fit model of nucleotide substitution. *Syst Biol* 50:580–601.
37. Posada D, Crandall KA (1998) MODELTEST: Testing the model of DNA substitution. *Bioinformatics* 14:817–818.
38. Ronquist F, Huelsenbeck JP (2003) MrBayes 3: Bayesian phylogenetic inference under mixed models. *Bioinformatics* 19:1572–1574.
39. Brown JM, Hedtke SM, Lemmon AR, Lemmon EM (2010) When trees grow too long: Investigating the causes of highly inaccurate Bayesian branch-length estimates. *Syst Biol* 59:145–161.
40. Marshall DC, Simon C, Buckley TR (2006) Accurate branch length estimation in partitioned Bayesian analyses requires accommodation of among-partition rate variation and attention to branch length priors. *Syst Biol* 55:993–1003.
41. Marshall DC (2010) Cryptic failure of partitioned Bayesian phylogenetic analyses: Lost in the land of long trees. *Syst Biol* 59:108–117.
42. Spinks PQ, Shaffer HB (2009) Conflicting mitochondrial and nuclear phylogenies for the widely disjunct Emys (Testudines: Emydidae) species complex, and what they tell us about biogeography and hybridization. *Syst Biol* 58:1–20.
43. Rambaut A, Drummond A (2007) Tracer v1.5. <http://tree.bio.ed.ac.uk/software/tracer>.
44. Newton MA, Raftery AE (1994) Approximate Bayesian inference with the weighted likelihood bootstrap. *J R Stat Soc, B* 56:3–48.
45. Suchard MA, Weiss RE, Sinsheimer JS (2001) Bayesian selection of continuous-time Markov chain evolutionary models. *Mol Biol Evol* 18:1001–1013.
46. Zwickl D (2006) Genetic algorithm approaches for the phylogenetic analysis of large biological sequence datasets under the maximum likelihood criterion. PhD dissertation (Univ of Texas at Austin). <http://garli.googlecode.com>.
47. Kass RE, Raftery AE (1995) Bayes factors. *J Am Stat Assoc* 90:773–795.
48. Nylander JAA, Ronquist F, Huelsenbeck JP, Nieves-Aldrey JL (2004) Bayesian phylogenetic analysis of combined data. *Syst Biol* 53:47–67.
49. Brown JM, Lemmon AR (2007) The importance of data partitioning and the utility of Bayes factors in Bayesian phylogenetics. *Syst Biol* 56:643–655.
50. Rabeling C, Brown JM, Verhaagh M (2008) Newly discovered sister lineage sheds light on early ant evolution. *Proc Natl Acad Sci USA* 105:14913–14917.
51. Brandley MC, Schmitz A, Reeder TW (2005) Partitioned Bayesian analyses, partition choice, and the phylogenetic relationships of scincid lizards. *Syst Biol* 54:373–390.
52. Drummond AJ, Nicholls GK, Rodrigo AG, Solomon W (2002) Estimating mutation parameters, population history and genealogy simultaneously from temporally spaced sequence data. *Genetics* 161:1307–1320.
53. Drummond AJ, Ho SYW, Phillips MJ, Rambaut A (2006) Relaxed phylogenetics and dating with confidence. *PLoS Biol* 4:e88.
54. Drummond AJ, Rambaut A (2007) BEAST: Bayesian evolutionary analysis by sampling trees. *BMC Evol Biol* 7:214.
55. Brady SG, Schultz TR, Fisher BL, Ward PS (2006) Evaluating alternative hypotheses for the early evolution and diversification of ants. *Proc Natl Acad Sci USA* 103:18172–18177.
56. Grimaldi DA, Engel MS (2005) *Evolution of the Insects* (Cambridge Univ Press, New York).
57. Simon C, et al. (1994) Evolution, weighting, and phylogenetic utility of mitochondrial gene sequences and a compilation of conserved polymerase chain reaction primers. *Ann Entomol Soc Am* 87:651–701.
58. Ward PS, Downie DA (2005) The ant subfamily Pseudomyrmecinae (Hymenoptera: Formicidae): Phylogeny and evolution of big-eyed arboreal ants. *Syst Entomol* 30: 310–335.
59. Abouheif E, Wray GA (2002) Evolution of the gene network underlying wing polyphenism in ants. *Science* 297:249–252.
60. Folmer O, Black M, Hoeh W, Lutz R, Vrijenhoek R (1994) DNA primers for amplification of mitochondrial cytochrome c oxidase subunit I from diverse metazoan invertebrates. *Mol Mar Biol Biotechnol* 3:294–299.
61. Hasegawa E, Tinaut A, Ruano F (2002) Molecular phylogeny of two slave-making ants: *Rosomyrmex* and *Polyergus* (Hymenoptera: Formicidae). *Ann Zool Fenn* 39:267–271.
62. Artiss T, Schultz TR, Polhemus DA, Simon C (2001) Molecular phylogenetic analysis of the dragonfly genera *Libellula*, *Ladona*, and *Plathemis* (Odonata: Libellulidae) based on mitochondrial cytochrome oxidase I and 16S rRNA sequence data. *Mol Phylogenet Evol* 18:348–361.
63. Wetterer JK, Schultz TR, Meier R (1998) Phylogeny of fungus-growing ants (Tribe Attini) based on mtDNA sequence and morphology. *Mol Phylogenet Evol* 9:42–47.

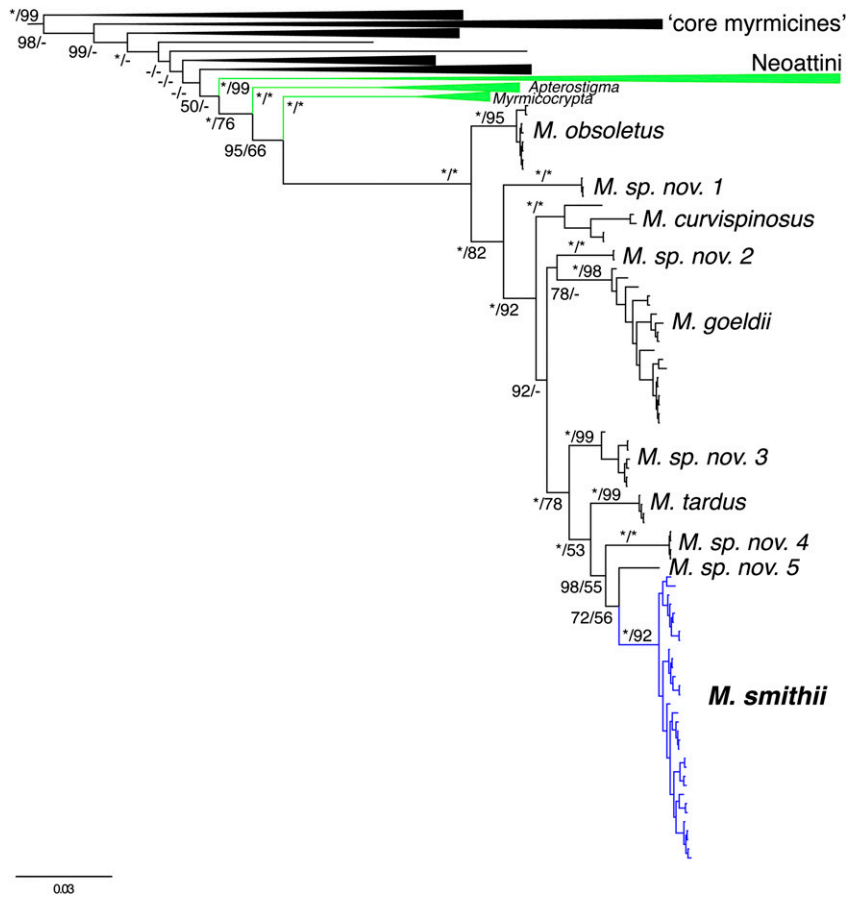

**Fig. S1.** Phylogram of the fungus-growing ant genus *Mycocepurus* generated by a Bayesian analysis of three nuclear protein-coding genes and one mitochondrial gene. Bayesian posterior probabilities ( $\times 100$ ) (BPP) and ML bootstrap proportions (MLBP) are indicated as BPP/MLBP; values of BPP = 100 or MLBP = 100 are indicated by an asterisk. Relationships between 87 outgroup taxa are collapsed to better depict relationships among *Mycocepurus* species. (Scale bar, number of substitutions per site.)

**Table S1. *Myocepurus smithii* populations sampled across Latin America**

| Country       | State           | Locality/population             | Number of individuals | Number of queens | Number of workers | Number of unique genotypes | Number of colonies | Genotype: colony ratio | Genotype: individual ratio |
|---------------|-----------------|---------------------------------|-----------------------|------------------|-------------------|----------------------------|--------------------|------------------------|----------------------------|
| Argentina     | Chaco           | Pampa del Indio                 | 5                     | 0                | 5                 | 1                          | 1                  | 1                      | 0.2                        |
| Argentina     | Misiones        | Iguazú National Park            | 22                    | 0                | 22                | 1                          | 3                  | 0.33                   | 0.05                       |
| <b>Brazil</b> | <b>Amazonas</b> | <b>Caldeirão</b>                | <b>243*</b>           | <b>5</b>         | <b>234</b>        | <b>173</b>                 | <b>11</b>          | <b>15.72</b>           | <b>0.71</b>                |
| Brazil        | Amazonas        | Manaus                          | 263                   | 13               | 250               | 3                          | 36                 | 0.08                   | 0.01                       |
| <b>Brazil</b> | <b>Amazonas</b> | <b>Parintins</b>                | <b>7</b>              | <b>0</b>         | <b>7</b>          | <b>5</b>                   | <b>1</b>           | <b>5</b>               | <b>0.71</b>                |
| Brazil        | Amazonas        | Reserva Ducke                   | 8                     | 0                | 8                 | 1                          | 1                  | 1                      | 0.13                       |
| Brazil        | Amazonas        | Santa Rita                      | 15                    | 0                | 15                | 1                          | 3                  | 0.33                   | 0.07                       |
| <b>Brazil</b> | <b>Amazonas</b> | <b>São Gabriel da Cachoeira</b> | <b>8</b>              | <b>0</b>         | <b>8</b>          | <b>8</b>                   | <b>1</b>           | <b>8</b>               | <b>1</b>                   |
| Brazil        | Pará            | Alter do Chão                   | 9                     | 0                | 9                 | 1                          | 1                  | 1                      | 0.1                        |
| <b>Brazil</b> | <b>Pará</b>     | <b>Belém</b>                    | <b>25</b>             | <b>0</b>         | <b>25</b>         | <b>24</b>                  | <b>3</b>           | <b>8</b>               | <b>0.96</b>                |
| Brazil        | Pará            | Belterra                        | 22                    | 0                | 22                | 2                          | 4                  | 0.5                    | 0.09                       |
| Brazil        | São Paulo       | Rio Claro                       | 390                   | 138 <sup>†</sup> | 252               | 2                          | 59                 | 0.03                   | 0.01                       |
| Costa Rica    | Limón           | Cahuita                         | 11                    | 0                | 11                | 1                          | 1                  | 1                      | 0.09                       |
| Costa Rica    | Guanacaste      | Lomas Barbudal                  | 25                    | 0                | 25                | 2                          | 5                  | 0.4                    | 0.08                       |
| Costa Rica    | Limón           | Limón                           | 28                    | 10 <sup>†</sup>  | 18                | 1                          | 2                  | 0.5                    | 0.04                       |
| Cuba          |                 | Cienfuegos                      | 20                    | 0                | 20                | 1                          | 2                  | 0.5                    | 0.05                       |
| Guatemala     | Peten           | El Remate                       | 45                    | 0                | 45                | 2                          | 9                  | 0.22                   | 0.04                       |
| Guatemala     | Peten           | Tikal                           | 15                    | 0                | 15                | 1                          | 3                  | 0.33                   | 0.07                       |
| Guyana        | Potaro-Siparuni | Paramakatoi                     | 24                    | 0                | 24                | 1                          | 3                  | 0.33                   | 0.04                       |
| Honduras      | Copán           | Copán Archeological Museum      | 15                    | 0                | 15                | 1                          | 3                  | 0.33                   | 0.07                       |
| Honduras      | Copán           | Copán Ruinas                    | 30                    | 0                | 30                | 3                          | 6                  | 0.5                    | 0.1                        |
| Mexico        | Chiapas         | El Panchan                      | 30                    | 0                | 30                | 4                          | 6                  | 0.67                   | 0.13                       |
| Mexico        | Chiapas         | Palenque                        | 10                    | 0                | 10                | 2                          | 2                  | 1                      | 0.2                        |
| Mexico        | Nuevo León      | Monterrey                       | 50                    | 0                | 50                | 1                          | 6                  | 0.17                   | 0.02                       |
| Mexico        | Tamaulipas      | El Encino                       | 35                    | 0                | 35                | 1                          | 5                  | 0.2                    | 0.03                       |
| Nicaragua     | Matagalpa       | El Tuma                         | 25                    | 0                | 25                | 1                          | 5                  | 0.2                    | 0.04                       |
| Panama        | Bocas del Toro  | Bocas del Toro                  | 33                    | 0                | 33                | 1                          | 4                  | 0.25                   | 0.03                       |
| Panama        | Colon           | Ft. Sherman                     | 35                    | 0                | 35                | 3                          | 4                  | 0.75                   | 0.09                       |
| Panama        | Colon           | Gamboa (breeding experiment)    | 93                    | 93 <sup>§</sup>  | 0                 | 1                          | 2                  | 0.5                    | 0.01                       |
| Panama        | Colon           | Gamboa                          | 20                    | 0                | 20                | 2                          | 1                  | 2                      | 0.1                        |
| Peru          | Cusco           | Huacaria                        | 40                    | 0                | 40                | 1                          | 4                  | 0.25                   | 0.03                       |
| Peru          | Cusco           | Pilcopata                       | 5                     | 0                | 5                 | 1                          | 1                  | 1                      | 0.2                        |
| Peru          | Loreto          | Explorama Lodge, Iquitos        | 47                    | 2                | 45                | 1                          | 4                  | 0.25                   | 0.02                       |
| Peru          | Madre de Dios   | CICRA, Los Amigos               | 149                   | 10               | 139               | 6                          | 15                 | 0.4                    | 0.04                       |
| Trinidad      |                 | Las Cuevas                      | 20                    | 0                | 20                | 3                          | 2                  | 1.5                    | 0.15                       |
| Trinidad      |                 | Arena Dam                       | 20                    | 0                | 20                | 1                          | 2                  | 0.5                    | 0.05                       |
| Trinidad      |                 | Pierreville                     | 20                    | 0                | 20                | 1                          | 1                  | 1                      | 0.05                       |
| Trinidad      |                 | Simla Research Station          | 18                    | 1                | 17                | 3                          | 2                  | 1.5                    | 0.17                       |
| Venezuela     | Aragua          | Ocumare de la Costa             | 40                    | 0                | 40                | 5                          | 8                  | 0.63                   | 0.13                       |
| Venezuela     | Aragua          | Rio Cumboto                     | 10                    | 0                | 10                | 3                          | 2                  | 1.5                    | 0.3                        |
| Total         |                 | 39 localities                   | 1,930                 | 272              | 1,654             | 276                        | 234                |                        |                            |

Number of individuals describes the sample total including queens and workers. Number of unique genotypes is the number of unique multilocus genotypes. Number of colonies corresponds to either the number of nest entrances or the number of chambers from which individuals were collected. The genotype:colony ratio describes the ratio between the number of genotypes and the number of sampled colonies (*SI Materials and Methods*). The genotype:individual ratio describes the ratio between the number of genotypes and the number of sampled individuals. A value of the genotype:individual ratio approaching 0 describes genetic uniformity within a colony; a value of 1 describes sexual reproduction under random mating. Recombining populations are italicized and highlighted in bold.

\*Number of individuals includes the number of male mates estimated from the spermatheca content extracted and genotyped from four queens.

<sup>†</sup>A total of 12 of the 138 queens were reproductively active; the remaining 126 individuals were queen larvae.

<sup>‡</sup>All 10 queens were alates emerging from the maternal colony and were not reproductively active at the time of collection.

<sup>§</sup>All queens were raised in six consecutive generations in a breeding experiment in laboratory colonies and represent offspring from two colonies initially collected in close proximity in Gamboa, Panama.

**Table S2. Sample size, observed and expected heterozygosity, and inbreeding coefficient of multilocus genotypes and recombinant populations (indicated by bold and italicized font)**

| Country       | State           | Locality/population             | Clone         | <i>n</i>         | <i>H<sub>o</sub></i> | <i>H<sub>e</sub></i> | <i>F<sub>IS</sub></i> |
|---------------|-----------------|---------------------------------|---------------|------------------|----------------------|----------------------|-----------------------|
| Argentina     | Chaco           | Pampa del Indio                 | PampaA        | 5                | 0.667                | 0.333                | -1                    |
| Argentina     | Misiones        | Iguazú National Park            | IguazuA [6]   | 22               | 0.917                | 0.458                | -1                    |
| <b>Brazil</b> | <b>Amazonas</b> | <b>Caldeirão</b>                | <i>n/a</i>    | <b>243 (173)</b> | <b>0.372</b>         | <b>0.369</b>         | <b>-0.009</b>         |
| Brazil        | Amazonas        | Manaus                          | ManausA       | 5                | 0.667                | 0.333                | -1                    |
|               |                 |                                 | ManausB [6]   | 5                | 0.917                | 0.458                | -1                    |
|               |                 |                                 | ManausC [7]   | 253              | 0.417                | 0.208                | -1                    |
| <b>Brazil</b> | <b>Amazonas</b> | <b>Parintins</b>                | <i>n/a</i>    | <b>7 (5)</b>     | <b>0.650</b>         | <b>0.398</b>         | <b>-0.773</b>         |
| Brazil        | Amazonas        | Reserva Ducke                   | DuckeA [7]    | 8                | 0.417                | 0.208                | -1                    |
| Brazil        | Amazonas        | Santa Rita                      | RitaA         | 15               | 0.667                | 0.333                | -1                    |
| <b>Brazil</b> | <b>Amazonas</b> | <b>São Gabriel da Cachoeira</b> | <i>n/a</i>    | <b>8 (8)</b>     | <b>0.365</b>         | <b>0.315</b>         | <b>-0.172</b>         |
| Brazil        | Pará            | Alter do Chão                   | AlterA        | 9                | 0.75                 | 0.375                | -1                    |
| <b>Brazil</b> | <b>Pará</b>     | <b>Belém</b>                    | <i>n/a</i>    | <b>25 (24)</b>   | <b>0.451</b>         | <b>0.466</b>         | <b>0.034</b>          |
| Brazil        | Pará            | Belterra                        | BelterraA     | 17               | 0.417                | 0.208                | -1                    |
|               |                 |                                 | BelterraB     | 5                | 0.667                | 0.333                | -1                    |
| Brazil        | São Paulo       | Rio Claro                       | RioClaroA     | 295              | 0.5                  | 0.25                 | -1                    |
|               |                 |                                 | RioClaroB     | 95               | 0.5                  | 0.25                 | -1                    |
| Costa Rica    | Limón           | Cahuita                         | CahuitaA      | 11               | 0.333                | 0.167                | -1                    |
| Costa Rica    | Guanacaste      | Lomas Barbudal                  | LomasA        | 20               | 0.833                | 0.417                | -1                    |
|               |                 |                                 | LomasB        | 5                | 0.75                 | 0.375                | -1                    |
| Costa Rica    | Limón           | Limón                           | LimonaA       | 28               | 0.583                | 0.292                | -1                    |
| Cuba          |                 | Cienfuegos                      | CubaA [4]     | 20               | 0.667                | 0.333                | -1                    |
| Guatemala     | Peten           | El Remate                       | RemateA [1]   | 35               | 0.417                | 0.208                | -1                    |
|               |                 |                                 | RemateB       | 10               | 0.5                  | 0.25                 | -1                    |
| Guatemala     | Peten           | Tikal                           | TikalA [1]    | 15               | 0.417                | 0.208                | -1                    |
| Guyana        | Potaro-Siparuni | Paramakatoi                     | ParamakatoiA  | 24               | 0.75                 | 0.375                | -1                    |
| Honduras      | Copán           | Copán Archeological Museum      | MuseumA       | 15               | 0.583                | 0.292                | -1                    |
| Honduras      | Copán           | Copán Ruinas                    | CopanaA       | 9                | 0.25                 | 0.125                | -1                    |
|               |                 |                                 | CopanaB       | 16               | 0.167                | 0.083                | -1                    |
|               |                 |                                 | CopanaC       | 5                | 0.5                  | 0.25                 | -1                    |
| Mexico        | Chiapas         | El Panchan                      | PanchanA      | 15               | 0.5                  | 0.25                 | -1                    |
|               |                 |                                 | PanchanB      | 5                | 0.667                | 0.333                | -1                    |
|               |                 |                                 | PanchanC      | 5                | 0.583                | 0.292                | -1                    |
|               |                 |                                 | PanchanD      | 5                | 0.5                  | 0.25                 | -1                    |
| Mexico        | Chiapas         | Palenque                        | PalenqueA     | 5                | 0.5                  | 0.25                 | -1                    |
|               |                 |                                 | PalenqueB     | 5                | 0.417                | 0.208                | -1                    |
| Mexico        | Nuevo Leon      | Monterrey                       | MonterreyA    | 50               | 0.417                | 0.208                | -1                    |
| Mexico        | Tamaulipas      | El Cielo                        | ElCieloA      | 35               | 0.5                  | 0.25                 | -1                    |
| Nicaragua     | Matagalpa       | El Tuma                         | ElTumaA       | 25               | 0.667                | 0.333                | -1                    |
| Panama        | Bocas del Toro  | Bocas del Toro                  | BocasA        | 33               | 0.333                | 0.167                | -1                    |
| Panama        | Colon           | Ft. Sherman                     | ShermanA [5]  | 10               | 0.583                | 0.292                | -1                    |
|               |                 |                                 | ShermanB      | 15               | 0.583                | 0.292                | -1                    |
|               |                 |                                 | ShermanC [2]  | 10               | 0.583                | 0.292                | -1                    |
| Panama        | Colon           | Gamboa (breeding experiment)    | GamboaA [5]   | 93               | 0.583                | 0.292                | -1                    |
| Panama        | Colon           | Gamboa                          | GamboaB [2]   | 13               | 0.583                | 0.292                | -1                    |
|               |                 |                                 | GamboaC       | 7                | 0.583                | 0.292                | -1                    |
| Peru          | Cusco           | Huacaria                        | HuacariaA     | 40               | 0.667                | 0.333                | -1                    |
| Peru          | Cusco           | Pilcopata                       | PilcopataA    | 5                | 0.667                | 0.333                | -1                    |
| Peru          | Loreto          | Explorama Lodge, Iquitos        | IquitosA      | 47               | 0.5                  | 0.375                | -1                    |
| Peru          | Madre de Dios   | CICRA, Los Amigos               | AmigosA       | 23               | 0.833                | 0.417                | -1                    |
|               |                 |                                 | AmigosB       | 6                | 0.75                 | 0.375                | -1                    |
|               |                 |                                 | AmigosC       | 22               | 0.75                 | 0.375                | -1                    |
|               |                 |                                 | AmigosD       | 41               | 0.75                 | 0.375                | -1                    |
|               |                 |                                 | AmigosE       | 18               | 0.75                 | 0.375                | -1                    |
|               |                 |                                 | AmigosF       | 39               | 0.75                 | 0.375                | -1                    |
| Trinidad      |                 | Las Cuevas                      | CuevasA       | 10               | 0.25                 | 0.125                | -1                    |
|               |                 |                                 | CuevasB [3]   | 3                | 0.417                | 0.208                | -1                    |
|               |                 |                                 | CuevasC [8]   | 7                | 0.5                  | 0.25                 | -1                    |
| Trinidad      |                 | Arena Dam                       | ArenaDamA [3] | 20               | 0.417                | 0.208                | -1                    |

**Table S2. Cont.**

| Country                    | State  | Locality/population    | Clone        | <i>n</i> | $H_o$ | $H_e$ | $F_{IS}$ |
|----------------------------|--------|------------------------|--------------|----------|-------|-------|----------|
| Trinidad                   |        | Pierreville            | PierrevilleA | 20       | 0.667 | 0.333 | -1       |
| Trinidad                   |        | Simla Research Station | SimlaA [4]   | 2        | 0.667 | 0.333 | -1       |
|                            |        |                        | SimlaB       | 8        | 0.583 | 0.292 | -1       |
|                            |        |                        | SimlaC [8]   | 8        | 0.5   | 0.25  | -1       |
| Venezuela                  | Aragua | Ocumare de la Costa    | OcumareA [3] | 5        | 0.417 | 0.208 | -1       |
|                            |        |                        | OcumareB     | 5        | 0.583 | 0.292 | -1       |
|                            |        |                        | OcumareC     | 5        | 0.5   | 0.25  | -1       |
|                            |        |                        | OcumareD     | 21       | 0.667 | 0.333 | -1       |
|                            |        |                        | OcumareE     | 4        | 0.75  | 0.375 | -1       |
| Venezuela                  | Aragua | Rio Cumboto            | CumbotoA     | 2        | 0.667 | 0.333 | -1       |
|                            |        |                        | CumbotoB     | 3        | 0.667 | 0.333 | -1       |
|                            |        |                        | CumbotoC     | 5        | 0.75  | 0.375 | -1       |
| Total (asexual)            |        |                        |              | 1,647    | 0.589 | 0.671 | 0.123    |
| Total (sexual)             |        |                        |              | 283      | 0.387 | 0.458 | 0.154    |
| Total (sexual and asexual) |        |                        |              | 1,930    | 0.430 | 0.545 | 0.210    |

Statistics are presented separately for each multilocus genotype in asexual populations. A total of eight identical multilocus genotypes is shared between colonies from different localities, which are indicated by numbers in square brackets. For recombinant populations, the number of multilocus genotypes is given in parentheses following the sample number; a single representative for each multilocus genotype was included to calculate the observed and expected heterozygosity and the inbreeding coefficient. n/a, not applicable.





Table S3. Cont.

|              | A9  | D117 | A5  | A6  | C119 | A6  | C104 | D11 | B1  | B4  | C2  | D8  |     |     |     |     |     |     |     |     |     |     |     |     |
|--------------|-----|------|-----|-----|------|-----|------|-----|-----|-----|-----|-----|-----|-----|-----|-----|-----|-----|-----|-----|-----|-----|-----|-----|
| AmigosC      | 141 | 147  | 202 | 205 | 246  | 246 | 256  | 265 | 111 | 120 | 111 | 115 | 204 | 213 | 288 | 291 | 090 | 207 | 207 | 236 | 236 | 168 | 171 |     |
| AmigosD      | 148 | 161  | 202 | 202 | 246  | 250 | 256  | 262 | 111 | 123 | 103 | 111 | 204 | 216 | 288 | 288 | 112 | 222 | 205 | 207 | 236 | 236 | 174 | 183 |
| AmigosE      | 148 | 161  | 202 | 205 | 242  | 246 | 243  | 262 | 111 | 120 | 111 | 111 | 204 | 213 | 288 | 288 | 112 | 222 | 205 | 207 | 236 | 236 | 174 | 177 |
| AmigosF      | 148 | 161  | 202 | 205 | 246  | 254 | 253  | 265 | 114 | 120 | 101 | 103 | 207 | 213 | 288 | 288 | 090 | 112 | 207 | 207 | 236 | 236 | 174 | 174 |
| CuevasA      | 141 | 148  | 208 | 208 | 250  | 250 | 253  | 253 | 120 | 120 | 111 | 111 | 213 | 213 | 285 | 288 | 112 | 114 | 207 | 207 | 236 | 236 | 171 | 171 |
| CuevasB      | 141 | 147  | 205 | 205 | 246  | 254 | 259  | 265 | 120 | 120 | 103 | 103 | 213 | 213 | 288 | 288 | 090 | 112 | 207 | 207 | 236 | 236 | 171 | 177 |
| CuevasC      | 145 | 148  | 205 | 205 | 244  | 248 | 253  | 259 | 120 | 126 | 103 | 103 | 213 | 219 | 288 | 291 | 112 | 112 | 207 | 207 | 236 | 236 | 171 | 171 |
| ArenaDamA    | 141 | 147  | 205 | 205 | 246  | 254 | 259  | 265 | 120 | 120 | 103 | 103 | 213 | 213 | 288 | 288 | 090 | 112 | 207 | 207 | 236 | 236 | 171 | 177 |
| PierrevilleA | 141 | 150  | 202 | 205 | 242  | 248 | 259  | 259 | 111 | 117 | 113 | 113 | 204 | 210 | 288 | 288 | 112 | 114 | 207 | 207 | 230 | 236 | 171 | 174 |
| SimlaA       | 143 | 143  | 202 | 205 | 250  | 250 | 259  | 265 | 114 | 120 | 111 | 111 | 207 | 213 | 285 | 291 | 108 | 112 | 207 | 207 | 233 | 236 | 171 | 174 |
| SimlaB       | 145 | 148  | 205 | 205 | 244  | 248 | 253  | 259 | 120 | 126 | 103 | 103 | 213 | 219 | 288 | 291 | 112 | 114 | 207 | 207 | 236 | 236 | 171 | 171 |
| SimlaC       | 145 | 148  | 205 | 205 | 244  | 248 | 253  | 259 | 120 | 126 | 103 | 103 | 213 | 219 | 288 | 291 | 112 | 112 | 207 | 207 | 236 | 236 | 171 | 171 |
| OcumareA     | 141 | 147  | 205 | 205 | 246  | 254 | 259  | 265 | 120 | 120 | 103 | 103 | 213 | 213 | 288 | 288 | 090 | 112 | 207 | 207 | 236 | 236 | 171 | 177 |
| OcumareB     | 141 | 141  | 202 | 205 | 246  | 250 | 259  | 265 | 123 | 132 | 103 | 115 | 216 | 225 | 288 | 288 | 108 | 112 | 207 | 207 | 236 | 236 | 171 | 174 |
| OcumareC     | 141 | 141  | 202 | 205 | 246  | 250 | 259  | 265 | 123 | 132 | 103 | 115 | 216 | 225 | 285 | 288 | 108 | 112 | 207 | 207 | 236 | 236 | 171 | 174 |
| OcumareD     | 141 | 141  | 202 | 205 | 246  | 250 | 259  | 265 | 123 | 123 | 103 | 115 | 216 | 225 | 288 | 288 | 108 | 112 | 207 | 207 | 236 | 236 | 171 | 174 |
| OcumareE     | 145 | 145  | 202 | 205 | 244  | 257 | 259  | 265 | 114 | 135 | 103 | 115 | 207 | 207 | 288 | 288 | 108 | 108 | 207 | 207 | 236 | 236 | 171 | 174 |
| CumbotoA     | 145 | 145  | 202 | 205 | 244  | 257 | 259  | 265 | 114 | 129 | 103 | 115 | 207 | 222 | 288 | 288 | 108 | 112 | 207 | 207 | 236 | 236 | 171 | 174 |
| CumbotoB     | 141 | 147  | 202 | 208 | 248  | 250 | 259  | 265 | 123 | 129 | 103 | 111 | 216 | 222 | 288 | 288 | 108 | 112 | 207 | 207 | 236 | 236 | 174 | 174 |
| CumbotoC     | 161 | 161  | 202 | 208 | 250  | 257 | 246  | 265 | 111 | 120 | 111 | 117 | 204 | 213 | 288 | 288 | 108 | 124 | 207 | 207 | 236 | 242 | 171 | 174 |

The number of unique multilocus genotypes is 57, because 8 genotypes are shared among the following populations: Tikal A and Remate A, Gamboa B and Sherman C, Ocumare A and Arena Dam A and Cuevas B, Simla A and Cuba A, Gamboa A and Sherman A, Manaus B and Iguazu A, Duche A and Manaus C, and Simla C and Cuevas C. Individuals of the Simla and Cuba, Manaus and Iguazu, Manaus and Duche, and Ocumare and Arena Dam populations do not seem to be closely related based on their mitochondrial genotypes (Fig. 3). Therefore, we caution that identical multilocus genotypes may not in every case indicate common descent but in some cases result from convergent evolution, that is, fragments identical in size but not in sequence. Alternatively, mitochondrial heteroplasmy, the occurrence of multiple mitochondrial haplotypes within a single individual, is also consistent with the observed pattern. Future studies will have to explore this seemingly paradoxical result.

**Table S4. Comparison of genotypes (allele sizes measured as base pairs) at 12 microsatellite loci from one selected sexual and one selected asexual population of *M. smithii***

| Individuals    | A9         | A9  | A9  | A9  | A5  | A5  | A5  | A5         | A5  | A6         | A6  | A6  | A6  | A6         | C104 | C104 | D11 | D11        | D11 | B1  | B1  | B1  | B4  | B4  | B4  | B4  | C2  | C2  | C2  | D8 | D8 | D8 | D8 | D8 |
|----------------|------------|-----|-----|-----|-----|-----|-----|------------|-----|------------|-----|-----|-----|------------|------|------|-----|------------|-----|-----|-----|-----|-----|-----|-----|-----|-----|-----|-----|----|----|----|----|----|
| <b>Sexual</b>  |            |     |     |     |     |     |     |            |     |            |     |     |     |            |      |      |     |            |     |     |     |     |     |     |     |     |     |     |     |    |    |    |    |    |
| Queen (1)      | 141        | 149 | 202 | 205 | 242 | 250 | 246 | 246        | 246 | 117        | 117 | 111 | 113 | 210        | 210  | 288  | 288 | 288        | 112 | 114 | 207 | 207 | 207 | 233 | 233 | 236 | 236 | 162 | 171 |    |    |    |    |    |
| Queen (1)      | 143        | 143 | 202 | 202 | 242 | 252 | 246 | 256        | 117 | 117        | 103 | 113 | 210 | 210        | 288  | 288  | 288 | 112        | 112 | 205 | 205 | 205 | 233 | 233 | 236 | 236 | 171 | 174 |     |    |    |    |    |    |
| Queen (1)      | 143        | 143 | 202 | 202 | 242 | 252 | 246 | 256        | 117 | 117        | 103 | 113 | 210 | 210        | 288  | 288  | 288 | 112        | 112 | 205 | 205 | 207 | 233 | 233 | 236 | 236 | 171 | 174 |     |    |    |    |    |    |
| Queen (1)      | 143        | 149 | 202 | 202 | 250 | 252 | 246 | 256        | 117 | 117        | 103 | 111 | 210 | 210        | 288  | 288  | 288 | 112        | 112 | 205 | 205 | 207 | 233 | 233 | 236 | 236 | 171 | 174 |     |    |    |    |    |    |
| Queen (1)      | 143        | 149 | 202 | 202 | 250 | 250 | 250 | 259        | 117 | 117        | 103 | 111 | 210 | 210        | 288  | 288  | 288 | 112        | 112 | 205 | 205 | 207 | 236 | 236 | 236 | 236 | 171 | 171 |     |    |    |    |    |    |
| Male (1)       | 143        | 205 | 202 | 202 | 250 | 250 | 259 | <b>120</b> | 117 | <b>120</b> | 111 | 111 | 210 | <b>213</b> | 288  | 288  | 288 | 112        | 112 | 207 | 207 | 207 | 236 | 236 | 236 | 236 | 171 | 171 |     |    |    |    |    |    |
| Male (1)       | 143        | 205 | 202 | 202 | 242 | 259 | 259 | 117        | 117 | 117        | 103 | 111 | 210 | 207        | 288  | 288  | 288 | <b>108</b> | 207 | 207 | 207 | 236 | 236 | 236 | 236 | 162 | 171 |     |     |    |    |    |    |    |
| Male (1)       | 143        | 202 | 202 | 202 | 250 | 250 | 259 | 117        | 117 | 117        | 111 | 111 | 210 | 207        | 288  | 288  | 288 | 112        | 112 | 207 | 207 | 207 | 236 | 236 | 236 | 236 | 171 | 171 |     |    |    |    |    |    |
| Male (1)       | <b>148</b> | 202 | 202 | 205 | 242 | 250 | 246 | 246        | 117 | 117        | 111 | 111 | 210 | 210        | 288  | 288  | 288 | 112        | 112 | 207 | 207 | 207 | 236 | 236 | 236 | 236 | 171 | 171 |     |    |    |    |    |    |
| Worker (1)     | 143        | 143 | 202 | 205 | 250 | 250 | 259 | 259        | 117 | <b>120</b> | 103 | 111 | 210 | <b>213</b> | 288  | 288  | 288 | 112        | 112 | 207 | 207 | 207 | 236 | 236 | 236 | 236 | 171 | 171 |     |    |    |    |    |    |
| Worker (1)     | 149        | 149 | 202 | 205 | 242 | 250 | 246 | 246        | 117 | <b>120</b> | 103 | 113 | 210 | <b>213</b> | 288  | 288  | 288 | 112        | 112 | 205 | 205 | 207 | 236 | 236 | 236 | 236 | 174 | 177 |     |    |    |    |    |    |
| Worker (1)     | 143        | 143 | 202 | 205 | 250 | 250 | 250 | 259        | 117 | <b>120</b> | 111 | 111 | 210 | <b>213</b> | 288  | 288  | 288 | 112        | 112 | 207 | 207 | 207 | 236 | 236 | 236 | 236 | 171 | 171 |     |    |    |    |    |    |
| Worker (1)     | 149        | 149 | 202 | 202 | 250 | 252 | 246 | 256        | 117 | 117        | 103 | 111 | 210 | 210        | 288  | 288  | 288 | 112        | 112 | 205 | 205 | 207 | 236 | 236 | 236 | 236 | 171 | 171 |     |    |    |    |    |    |
| Worker (1)     | 143        | 143 | 202 | 202 | 242 | 252 | 246 | 256        | 117 | 117        | 103 | 113 | 210 | 210        | 288  | 288  | 288 | 112        | 112 | 207 | 207 | 207 | 233 | 233 | 236 | 236 | 171 | 171 |     |    |    |    |    |    |
| <b>Asexual</b> |            |     |     |     |     |     |     |            |     |            |     |     |     |            |      |      |     |            |     |     |     |     |     |     |     |     |     |     |     |    |    |    |    |    |
| Queen (6)      | 141        | 141 | 218 | 236 | 253 | 257 | 265 | 271        | 123 | 123        | 111 | 119 | 216 | 216        | 288  | 288  | 288 | 114        | 124 | 204 | 204 | 204 | 236 | 236 | 236 | 236 | 174 | 177 |     |    |    |    |    |    |
| Worker (168)   | 141        | 141 | 218 | 236 | 253 | 257 | 265 | 271        | 123 | 123        | 111 | 119 | 216 | 216        | 288  | 288  | 288 | 114        | 124 | 204 | 204 | 204 | 236 | 236 | 236 | 236 | 174 | 177 |     |    |    |    |    |    |
| Brood (121)    | 141        | 141 | 218 | 236 | 253 | 257 | 265 | 271        | 123 | 123        | 111 | 119 | 216 | 216        | 288  | 288  | 288 | 114        | 124 | 204 | 204 | 204 | 236 | 236 | 236 | 236 | 174 | 177 |     |    |    |    |    |    |
| Queen (6)      | 141        | 147 | 218 | 218 | 246 | 253 | 253 | 259        | 117 | 117        | 109 | 111 | 210 | 210        | 288  | 288  | 288 | 97         | 114 | 204 | 204 | 204 | 236 | 236 | 236 | 236 | 165 | 174 |     |    |    |    |    |    |
| Worker (84)    | 141        | 147 | 218 | 218 | 246 | 253 | 253 | 259        | 117 | 117        | 109 | 111 | 210 | 210        | 288  | 288  | 288 | 97         | 114 | 204 | 204 | 204 | 236 | 236 | 236 | 236 | 165 | 174 |     |    |    |    |    |    |
| Brood (5)      | 141        | 147 | 218 | 218 | 246 | 253 | 253 | 259        | 117 | 117        | 109 | 111 | 210 | 210        | 288  | 288  | 288 | 97         | 114 | 204 | 204 | 204 | 236 | 236 | 236 | 236 | 165 | 174 |     |    |    |    |    |    |

In the leftmost column, the number in parentheses following the caste/sex of the individual indicates the number of samples with the depicted genotype. Representative genotypes for a sexual population are from the Caldeirão population. "Male" genotypes were determined from the spermatheca content of inseminated queens. Paternal alleles appear as bold, italicized numbers. Worker genotypes of this sexual population were selected to represent a diversity of maternal and paternal alleles, including recombinant genotypes. Note that not all alleles present in the sperm were recovered in the worker genotypes and, conversely, workers carried a few alleles not detected in either queens or males, indicating that the allelic diversity present in this population was not sampled exhaustively. Samples representing the asexual population were collected in Rio Claro, São Paulo. In this asexual population, only two identical multilocus genotypes were found among 390 genotyped individuals representing queens, workers, and female brood; males are not known to occur in strictly asexual populations (8).

**Table S5. *Mycocarpus* taxa used for the phylogenetic analyses with GenBank accession numbers**

| Species                 | Extraction code | Collector's code   | Country    | Sample locality                              | EF1- $\alpha$ F1 exon 1 | EF1- $\alpha$ F1 exon 2 | Wg exon 1 | LW Rh exon 1 | LW Rh exon 2 | COI      | tRNA Leu | COII     |
|-------------------------|-----------------|--------------------|------------|----------------------------------------------|-------------------------|-------------------------|-----------|--------------|--------------|----------|----------|----------|
| <i>M. curvispinosus</i> | M228            | UGM0950612         | Costa Rica | Parque Nacional Santa Rosa                   | JN054745                | JN054829                | JN055079  | JN054913     | JN054996     | JN055163 | n/a      | n/a      |
| <i>M. curvispinosus</i> | M285            | AGH010405-01       | Panama     | Pipeline Rd. Km 6, Parque Nacional Soberania | JN054746                | JN054830                | JN055080  | JN054914     | JN054997     | JN055164 | n/a      | n/a      |
| <i>M. curvispinosus</i> | M286            | AGH010405-01       | Panama     | Pipeline Rd. Km 6, Parque Nacional Soberania | JN054747                | JN054831                | JN055081  | JN054915     | JN054998     | JN055165 | n/a      | n/a      |
| <i>M. curvispinosus</i> | M296            | E.Deulefent M2169  | Colombia   | Villa Roca                                   | JN054748                | JN054832                | JN055082  | JN054916     | JN054999     | JN055166 | n/a      | n/a      |
| <i>M. curvispinosus</i> | M317            | CR071221-09        | Costa Rica | Lomas Barbudal                               | JN054749                | JN054833                | JN055083  | JN054917     | JN055000     | JN055167 | n/a      | n/a      |
| <i>M. goeldii</i>       | M028            | CR050121-05        | Brazil     | Pareci Novo, Rio Grande do Sul               | JN054750                | JN054834                | JN055084  | JN054918     | JN055001     | JN055168 | n/a      | n/a      |
| <i>M. goeldii</i>       | M145            | MB050906-07        | Brazil     | Rio Claro, São Paulo                         | JN054751                | JN054835                | JN055085  | JN054919     | JN055002     | JN055169 | n/a      | n/a      |
| <i>M. goeldii</i>       | M241            | CR060903-01        | Brazil     | Manaus, Amazonas                             | JN054752                | JN054836                | JN055086  | JN054920     | JN055003     | JN055170 | n/a      | n/a      |
| <i>M. goeldii</i>       | M263            | CR060819-05        | Brazil     | Alter do Chão, Pará                          | JN054753                | JN054837                | JN055087  | JN054921     | JN055004     | JN055171 | n/a      | n/a      |
| <i>M. goeldii</i>       | M278            | J.Martins061011-05 | Brazil     | Júlio de Castilhos, Rio Grande do Sul        | JN054754                | JN054838                | JN055088  | n/a          | n/a          | JN055172 | n/a      | n/a      |
| <i>M. goeldii</i>       | M280            | R.Feitosa061001    | Brazil     | Lizarda, Tocantins                           | JN054755                | JN054839                | JN055089  | JN054922     | JN055005     | JN055173 | n/a      | n/a      |
| <i>M. goeldii</i>       | M281            | Dietz&Silva041006  | Brazil     | Ponte Alta do Bom Jesus, Tocantins           | JN054756                | JN054840                | JN055090  | JN054923     | JN055006     | JN055174 | n/a      | n/a      |
| <i>M. goeldii</i>       | M299            | CR070716-05        | Brazil     | Brasília, Distrito Federal                   | JN054757                | JN054841                | JN055091  | JN054924     | JN055007     | JN055175 | n/a      | n/a      |
| <i>M. goeldii</i>       | M307            | CR061002-02        | Brazil     | Rio Claro, São Paulo                         | JN054758                | JN054842                | JN055092  | JN054925     | JN055008     | JN055176 | n/a      | n/a      |
| <i>M. goeldii</i>       | M328            | UGM080921-01       | Brazil     | Estação Ecológica do Panga, Minas Gerais     | JN054759                | JN054843                | JN055093  | JN054926     | JN055009     | JN055177 | n/a      | n/a      |
| <i>M. goeldii</i>       | M329            | UGM080928-01       | Brazil     | Piracanjuba, Goiás                           | JN054760                | JN054844                | JN055094  | JN054927     | JN055010     | JN055178 | n/a      | n/a      |
| <i>M. goeldii</i>       | M330            | UGM080929-02       | Brazil     | Jussara, Goiás                               | JN054761                | JN054845                | JN055095  | JN054928     | JN055011     | JN055179 | n/a      | n/a      |
| <i>M. goeldii</i>       | M331            | UGM081003-01       | Brazil     | Roadside nr. Cuiabá, Mato Grosso             | JN054762                | JN054846                | JN055096  | JN054929     | JN055012     | JN055180 | n/a      | n/a      |
| <i>M. goeldii</i>       | M333            | CR081003-01        | Brazil     | Rio Claro, São Paulo                         | JN054763                | JN054847                | JN055097  | JN054930     | JN055013     | JN055181 | n/a      | n/a      |
| <i>M. goeldii</i>       | M335            | CR081003-04        | Brazil     | Rio Claro, São Paulo                         | JN054764                | JN054848                | JN055098  | JN054931     | JN055014     | JN055182 | n/a      | n/a      |
| <i>M. goeldii</i>       | M337            | CR081002-02        | Brazil     | Rio Claro, São Paulo                         | JN054765                | JN054849                | JN055099  | JN054932     | JN055015     | JN055183 | n/a      | n/a      |
| <i>M. goeldii</i>       | M339            | CR081002-07        | Brazil     | Rio Claro, São Paulo                         | JN054766                | JN054850                | JN055100  | JN054933     | JN055016     | JN055184 | n/a      | n/a      |
| <i>M. goeldii</i>       | M340            | CR060831-12        | Brazil     | Caldairão, Amazonas                          | JN054767                | JN054851                | JN055101  | JN054934     | JN055017     | JN055185 | n/a      | n/a      |
| <i>M. obsoletus</i>     | M243            | CR060906-02        | Brazil     | Parintins, Amazonas                          | JN054768                | JN054852                | JN055102  | JN054935     | JN055018     | JN055186 | n/a      | n/a      |
| <i>M. obsoletus</i>     | M249            | CR060906-03        | Brazil     | Parintins, Amazonas                          | JN054769                | JN054853                | JN055103  | JN054936     | JN055019     | JN055187 | n/a      | n/a      |
| <i>M. obsoletus</i>     | M255            | CR060813-04        | Brazil     | Alter do Chão, Pará                          | JN054770                | JN054854                | JN055104  | JN054937     | JN055020     | JN055188 | n/a      | n/a      |
| <i>M. obsoletus</i>     | M256            | CR060813-06        | Brazil     | Alter do Chão, Pará                          | JN054771                | JN054855                | JN055105  | JN054938     | JN055021     | JN055189 | n/a      | n/a      |
| <i>M. obsoletus</i>     | M260            | CR060816-06        | Brazil     | Alter do Chão, Pará                          | JN054772                | JN054856                | JN055106  | JN054939     | JN055022     | JN055190 | n/a      | n/a      |
| <i>M. obsoletus</i>     | M266            | CR060908-01        | Brazil     | Maranhão, Amazonas                           | JN054773                | JN054857                | JN055107  | JN054940     | JN055023     | JN055191 | n/a      | n/a      |
| <i>M. obsoletus</i>     | M300            | CR070717-01        | Brazil     | Brasília, Distrito Federal                   | JN054774                | JN054858                | JN055108  | JN054941     | JN055024     | JN055192 | n/a      | n/a      |
| <i>M. obsoletus</i>     | M314            | SCC081112-01       | Brazil     | Brasília, Distrito Federal                   | JN054775                | JN054859                | JN055109  | JN054942     | JN055025     | JN055193 | n/a      | n/a      |
| <i>M. smithii</i>       | M070            | CR050318-03        | Cuba       | Cienfuegos                                   | JN054776                | JN054860                | JN055110  | JN054943     | JN055026     | JN055231 | JN055313 | JN055272 |
| <i>M. smithii</i>       | M071            | CR050318-03        | Cuba       | Cienfuegos                                   | JN054777                | JN054861                | JN055111  | JN054944     | JN055027     | JN055194 | n/a      | n/a      |

Table S5. Cont.

| Species           | Extraction code | Collector's code | Country    | Sample locality                            | EF1- $\alpha$ F1 exon 1 | EF1- $\alpha$ F1 exon 2 | Wg exon 1 | LW Rh exon 1 | LW Rh exon 2 | COI      | tRNA Leu | COII     |
|-------------------|-----------------|------------------|------------|--------------------------------------------|-------------------------|-------------------------|-----------|--------------|--------------|----------|----------|----------|
| <i>M. smithii</i> | M109            | CR040613-01      | Peru       | Explorama Lodge, Iquitos                   | JN054778                | JN054862                | JN055112  | JN054945     | JN055028     | JN055232 | JN055314 | JN055273 |
| <i>M. smithii</i> | M110            | CR040613-02      | Peru       | Explorama Lodge, Iquitos                   | JN054779                | JN054863                | JN055113  | JN054946     | JN055029     | JN055233 | JN055315 | JN055274 |
| <i>M. smithii</i> | M129            | UGM950107-07     | Trinidad   | Simia Research Station                     | n/a                     | n/a                     | n/a       | n/a          | n/a          | JN055234 | JN055316 | JN055275 |
| <i>M. smithii</i> | M131            | UGM950112-09     | Trinidad   | Pierreville                                | n/a                     | n/a                     | n/a       | n/a          | n/a          | JN055235 | JN055317 | JN055276 |
| <i>M. smithii</i> | M132            | UGM950114-08     | Trinidad   | Arena Dam                                  | JN054780                | JN054864                | JN055114  | JN054947     | JN055030     | JN055236 | JN055318 | JN055277 |
| <i>M. smithii</i> | M152            | UGM960116-01     | Panama     | Canal Zone                                 | n/a                     | n/a                     | n/a       | n/a          | n/a          | JN055237 | JN055319 | JN055278 |
| <i>M. smithii</i> | M170            | UGM950616-01     | Costa Rica | Limón                                      | n/a                     | n/a                     | n/a       | n/a          | n/a          | JN055238 | JN055320 | JN055279 |
| <i>M. smithii</i> | M175            | TRS960416-12     | Guyana     | Paramakatoi                                | JN054781                | JN054865                | JN055115  | JN054948     | JN055031     | JN055239 | JN055321 | JN055280 |
| <i>M. smithii</i> | M182            | TRS960428-22     | Panama     | Ft. Sherman                                | JN054782                | JN054866                | JN055116  | JN054949     | JN055032     | JN055240 | JN055322 | JN055281 |
| <i>M. smithii</i> | M186            | TRS920821-17     | Brazil     | São Gabriel da Cachoeira, Amazonas         | n/a                     | n/a                     | n/a       | n/a          | n/a          | JN055241 | JN055323 | JN055282 |
| <i>M. smithii</i> | M198            | UGM950110-02     | Trinidad   | Las Cuevas                                 | n/a                     | n/a                     | n/a       | n/a          | n/a          | JN055242 | JN055324 | JN055283 |
| <i>M. smithii</i> | M218            | CR060627-07      | Mexico     | El Encino, Tamaulipas                      | JN054783                | JN054867                | JN055117  | JN054950     | JN055033     | JN055243 | JN055325 | JN055284 |
| <i>M. smithii</i> | M226            | UGM030329-02     | Argentina  | Iguazú National Park                       | JN054784                | JN054868                | JN055118  | JN054951     | JN055034     | JN055244 | JN055326 | JN055285 |
| <i>M. smithii</i> | M230            | UGM960116-01     | Panama     | Gamboa                                     | JN054785                | JN054869                | JN055119  | JN054952     | JN055035     | JN055195 | n/a      | n/a      |
| <i>M. smithii</i> | M264            | CR060820-03      | Brazil     | Belterra, Pará                             | JN054786                | JN054870                | JN055120  | JN054953     | JN055036     | JN055245 | JN055327 | JN055286 |
| <i>M. smithii</i> | M267            | CR060908-04      | Brazil     | Badajós, Amazonas                          | JN054787                | JN054871                | JN055121  | JN054954     | JN055037     | JN055246 | JN055328 | JN055287 |
| <i>M. smithii</i> | M268            | CR060909-01      | Brazil     | Parintins, Amazonas                        | JN054788                | JN054872                | JN055122  | JN054955     | JN055038     | JN055247 | JN055329 | JN055288 |
| <i>M. smithii</i> | M275            | CR061011-03      | Brazil     | Rio Claro, São Paulo                       | JN054789                | JN054873                | JN055123  | JN054956     | JN055039     | JN055248 | JN055330 | JN055289 |
| <i>M. smithii</i> | M276            | CR061013-10      | Brazil     | Rio Claro, São Paulo                       | JN054790                | JN054874                | JN055124  | JN054957     | JN055040     | JN055196 | n/a      | n/a      |
| <i>M. smithii</i> | M279            | RRSiiVa041009    | Brazil     | Aurora do Tocantins, Tocantins             | JN054791                | JN054875                | JN055125  | JN054958     | JN055041     | JN055249 | JN055331 | JN055290 |
| <i>M. smithii</i> | M305            | G.Alpert020221   | St. Lucia  | Gros Islet, Point du Cap                   | JN054792                | JN054876                | JN055126  | JN054959     | JN055042     | JN055250 | JN055332 | JN055291 |
| <i>M. smithii</i> | M318            | CR071221-05      | Costa Rica | Lomas Barbudal                             | JN054793                | JN054877                | JN055127  | JN054960     | JN055043     | JN055251 | JN055333 | JN055292 |
| <i>M. smithii</i> | M319            | CR071229-05      | Nicaragua  | El Tuma                                    | JN054794                | JN054878                | JN055128  | JN054961     | JN055044     | JN055252 | JN055334 | JN055293 |
| <i>M. smithii</i> | M320            | CR080103-01      | Honduras   | Copán, Archeological Museum                | JN054795                | JN054879                | JN055129  | JN054962     | JN055045     | JN055253 | JN055335 | JN055294 |
| <i>M. smithii</i> | M321            | CR080108-04      | Guatemala  | El Remate                                  | JN054796                | JN054880                | JN055130  | JN054963     | JN055046     | JN055254 | JN055336 | JN055295 |
| <i>M. smithii</i> | M322            | CR080109-01      | Guatemala  | Tikal                                      | JN054797                | JN054881                | JN055131  | JN054964     | JN055047     | JN055255 | JN055337 | JN055296 |
| <i>M. smithii</i> | M323            | CR080110-04      | Mexico     | El Panchan, Chiapas                        | JN054798                | JN054882                | JN055132  | JN054965     | JN055048     | JN055256 | JN055338 | JN055297 |
| <i>M. smithii</i> | M324            | CR080111-02      | Mexico     | El Panchan, Chiapas                        | JN054799                | JN054883                | JN055133  | JN054966     | JN055049     | JN055197 | n/a      | n/a      |
| <i>M. smithii</i> | M325            | CR080813-06      | Venezuela  | Ocumare de la Costa                        | JN054800                | JN054884                | JN055134  | JN054967     | JN055050     | JN055257 | JN055339 | JN055298 |
| <i>M. smithii</i> | M326            | CR080815-01      | Venezuela  | Parque Nacional Henri Pittier, Rio Cumboto | JN054801                | JN054885                | JN055135  | JN054968     | JN055051     | JN055258 | JN055340 | JN055299 |
| <i>M. smithii</i> | M341            | CR060831-10      | Brazil     | Caldairão, Amazonas                        | JN054802                | JN054886                | JN055136  | JN054969     | JN055052     | JN055259 | JN055341 | JN055300 |
| <i>M. smithii</i> | M342            | CR060925-02      | Brazil     | Manaós, Amazonas                           | JN054803                | JN054887                | JN055137  | JN054970     | JN055053     | JN055260 | JN055342 | JN055301 |
| <i>M. smithii</i> | M343            | CR040528-03      | Peru       | Pilcopata                                  | JN054804                | JN054888                | JN055138  | JN054971     | JN055054     | JN055261 | JN055343 | JN055302 |
| <i>M. smithii</i> | M344            | CR040605-04      | Peru       | CICRA, Los Amigos                          | JN054805                | JN054889                | JN055139  | JN054972     | JN055055     | JN055262 | JN055344 | JN055303 |
| <i>M. smithii</i> | M353            | CR060808-03      | Brazil     | Belém, Pará                                | JN054806                | JN054890                | JN055140  | JN054973     | JN055056     | JN055263 | JN055345 | JN055304 |
| <i>M. smithii</i> | M354            | CR060814-03      | Brazil     | Alter do Chão, Pará                        | JN054807                | JN054891                | JN055141  | JN054974     | JN055057     | JN055264 | JN055346 | JN055305 |

Table S5. Cont.

| Species             | Extraction code | Collector's code | Country   | Sample locality                             | EF1- $\alpha$ F1 exon 1 | EF1- $\alpha$ F1 exon 2 | Wg exon 1 | LW Rh exon 1 | LW Rh exon 2 | COI      | tRNA Leu | COII     |
|---------------------|-----------------|------------------|-----------|---------------------------------------------|-------------------------|-------------------------|-----------|--------------|--------------|----------|----------|----------|
| <i>M. smithii</i>   | M355            | S.Sanchez-01     | Mexico    | Monterrey, Nuevo Leon                       | n/a                     | n/a                     | n/a       | n/a          | n/a          | JN055265 | JN055347 | JN055306 |
| <i>M. smithii</i>   | M356            | AGH020607-05     | Panama    | Bocas del Toro                              | n/a                     | n/a                     | n/a       | n/a          | n/a          | JN055266 | JN055348 | JN055307 |
| <i>M. smithii</i>   | M357            | UGM030406-03     | Argentina | Pampa del Indio                             | n/a                     | n/a                     | n/a       | n/a          | n/a          | JN055267 | JN055349 | JN055308 |
| <i>M. smithii</i>   | M358            | CR080104-02      | Honduras  | Copan Ruinas                                | n/a                     | n/a                     | n/a       | n/a          | n/a          | JN055268 | JN055350 | JN055309 |
| <i>M. smithii</i>   | M360            | TRS920816-07     | Brazil    | Reserva Ducke, Manaus, Amazonas             | n/a                     | n/a                     | n/a       | n/a          | n/a          | JN055269 | JN055351 | JN055310 |
| <i>M. smithii</i>   | M363            | CR060905-01      | Brazil    | Santa Rita, Amazonas                        | n/a                     | n/a                     | n/a       | n/a          | n/a          | JN055270 | JN055352 | JN055311 |
| <i>M. smithii</i>   | M364            | CR040530-04      | Peru      | Huacaria                                    | n/a                     | n/a                     | n/a       | n/a          | n/a          | JN055271 | JN055353 | JN055312 |
| <i>M. tardus</i>    | M162            | UGM960125-01     | Panama    | Pipeline Rd. Km6, Parque Nacional Soberania | JN054808                | JN054892                | JN055142  | JN054975     | JN055058     | JN055198 | n/a      | n/a      |
| <i>M. tardus</i>    | M173            | UGM950202-03     | Panama    | Pipeline Rd. Km6, Parque Nacional Soberania | JN054809                | JN054893                | JN055143  | JN054976     | JN055059     | JN055199 | n/a      | n/a      |
| <i>M. tardus</i>    | M309            | UGM960202-02     | Panama    | Pipeline Rd. Km6, Parque Nacional Soberania | JN054810                | JN054894                | JN055144  | JN054977     | JN055060     | JN055200 | n/a      | n/a      |
| <i>M. tardus</i>    | M310            | UGM960202-01     | Panama    | Pipeline Rd. Km6, Parque Nacional Soberania | JN054811                | JN054895                | JN055145  | JN054978     | JN055061     | JN055201 | n/a      | n/a      |
| <i>M</i> sp. nov. 1 | M250            | CR060906-05      | Brazil    | Parintins, Amazonas                         | JN054812                | JN054896                | JN055146  | JN054979     | JN055062     | JN055202 | n/a      | n/a      |
| <i>M</i> sp. nov. 1 | M251            | CR060906-09      | Brazil    | Parintins, Amazonas                         | JN054813                | JN054897                | JN055147  | JN054980     | JN055063     | JN055203 | n/a      | n/a      |
| <i>M</i> sp. nov. 1 | M252            | CR060906-07      | Brazil    | Parintins, Amazonas                         | JN054814                | JN054898                | JN055148  | JN054981     | JN055064     | JN055204 | n/a      | n/a      |
| <i>M</i> sp. nov. 2 | M245            | CR060915-01      | Brazil    | Manaus, Amazonas                            | JN054815                | JN054899                | JN055149  | JN054982     | JN055065     | JN055205 | n/a      | n/a      |
| <i>M</i> sp. nov. 2 | M246            | CR060919-05      | Brazil    | Manaus, Amazonas                            | JN054816                | JN054900                | JN055150  | JN054983     | JN055066     | JN055206 | n/a      | n/a      |
| <i>M</i> sp. nov. 3 | M095            | CR040603-1-4     | Peru      | CICRA, Los Amigos                           | JN054817                | JN054901                | JN055151  | JN054984     | JN055067     | JN055207 | n/a      | n/a      |
| <i>M</i> sp. nov. 3 | M102            | CR040608-03      | Peru      | CICRA, Boca Amigos                          | JN054818                | JN054902                | JN055152  | JN054985     | JN055068     | JN055208 | n/a      | n/a      |
| <i>M</i> sp. nov. 3 | M103            | CR040608-04      | Peru      | CICRA, Boca Amigos                          | JN054819                | JN054903                | JN055153  | JN054986     | JN055069     | JN055209 | n/a      | n/a      |
| <i>M</i> sp. nov. 3 | M117            | CR040615-01/06   | Peru      | Explorama Lodge, Iquitos                    | JN054820                | JN054904                | JN055154  | JN054987     | JN055070     | JN055210 | n/a      | n/a      |
| <i>M</i> sp. nov. 3 | M135            | AGH030616-03     | Ecuador   | Tiputini Biodiversity Station               | JN054821                | JN054905                | JN055155  | JN054988     | JN055071     | JN055211 | n/a      | n/a      |
| <i>M</i> sp. nov. 3 | M136            | AGH030613-04     | Ecuador   | Tiputini Biodiversity Station               | JN054822                | JN054906                | JN055156  | JN054989     | JN055072     | JN055212 | n/a      | n/a      |
| <i>M</i> sp. nov. 3 | M345            | CR040529-02      | Peru      | Pilcopata                                   | JN054823                | JN054907                | JN055157  | JN054990     | JN055073     | JN055213 | n/a      | n/a      |
| <i>M</i> sp. nov. 4 | M153            | TRS960415-16     | Guyana    | Paramakatoi                                 | JN054824                | JN054908                | JN055158  | JN054991     | JN055074     | JN055214 | n/a      | n/a      |
| <i>M</i> sp. nov. 4 | M311            | TRS960415-17     | Guyana    | Paramakatoi                                 | JN054825                | JN054909                | JN055159  | JN054992     | JN055075     | JN055215 | n/a      | n/a      |
| <i>M</i> sp. nov. 4 | M312            | TRS960415-12     | Guyana    | Paramakatoi                                 | JN054826                | JN054910                | JN055160  | JN054993     | JN055076     | JN055216 | n/a      | n/a      |
| <i>M</i> sp. nov. 4 | M313            | TRS960415-13     | Guyana    | Paramakatoi                                 | JN054827                | JN054911                | JN055161  | JN054994     | JN055077     | JN055217 | n/a      | n/a      |
| <i>M</i> sp. nov. 5 | M294            | A.Parente M713   | Colombia  | Amacayacu National Park                     | JN054828                | JN054912                | JN055162  | JN054995     | JN055078     | JN055218 | n/a      | n/a      |

Outgroup taxa are listed in Schultz and Brady (31). Collection information can be requested from the first author.

**Table S6. Sequence characteristics and best-fit models of sequence evolution as calculated by hLRTs and the AIC**

| Gene                     | Number of sites | All taxa       |            | Ingroup        |            | hLRTs   | AIC     | Model Bayesian | Model partitioned ML |
|--------------------------|-----------------|----------------|------------|----------------|------------|---------|---------|----------------|----------------------|
|                          |                 | Variable sites | PI sites   | Variable sites | PI sites   |         |         |                |                      |
| <b>Global analysis</b>   |                 |                |            |                |            |         |         |                |                      |
| Ef1- $\alpha$ Exon1&2    | 1,071           | 370            | 363        | 43             | 35         |         |         |                |                      |
| Ef1- $\alpha$ Pos1&2     | 714             | 37             | 34         | 1              | 1          | TIM+I+G | TIM+I+G | GTR+I+G        | TIM+I+G              |
| Ef1- $\alpha$ Pos3       | 357             | 333            | 329        | 42             | 33         | GTR+I+G | GTR+I+G | GTR+I+G        | GTR+I+G              |
| Wg Exon                  | 405             | 187            | 164        | 20             | 18         |         |         |                |                      |
| Wg Pos1                  | 135             | 36             | 21         | 0              | 0          | K80+G   | TrNef+G | GTR+G          | TrNef+G              |
| Wg Pos2                  | 135             | 19             | 15         | 1              | 1          | K80+G   | K80+G   | K80+G          | K80+G                |
| Wg Pos3                  | 135             | 132            | 128        | 19             | 17         | HKY+G   | GTR+G   | GTR+G          | GTR+G                |
| LWR Exon1&2              | 456             | 206            | 193        | 25             | 23         |         |         |                |                      |
| LWR Pos1                 | 152             | 56             | 50         | 10             | 10         | HKY+I+G | HKY+I+G | HKY+I+G        | HKY+I+G              |
| LWR Pos2                 | 152             | 28             | 26         | 0              | 0          | GTR+G   | GTR+G   | GTR+G          | GTR+G                |
| LWR Pos3                 | 152             | 122            | 117        | 15             | 13         | HKY+I+G | HKY+I+G | HKY+I+G        | HKY+I+G              |
| COI                      | 387             | 146            | 140        | 146            | 140        |         |         |                |                      |
| COI Pos1&2               | 258             | 30             | 28         | 30             | 28         | TrN+I+G | TIM+I+G | GTR+I+G        | TIM+I+G              |
| COI Pos3                 | 129             | 116            | 112        | 116            | 112        | TrN+G   | TrN+G   | GTR+G          | TrN+G                |
| Total                    | <b>2,319</b>    | <b>909</b>     | <b>860</b> | <b>234</b>     | <b>216</b> | n/a     | n/a     | n/a            | n/a                  |
| <b>Local analysis</b>    |                 |                |            |                |            |         |         |                |                      |
| COI-II + tRNA Leu        | 1,515           | n/a            | n/a        | 248            | 169        |         |         |                |                      |
| COI-II Pos1&2 + tRNA Leu | 1,034           | n/a            | n/a        | 54             | 33         | HKY+I+G | TrN+I+G | GTR+I+G        | TrN+I+G              |
| COI-II Pos3              | 481             | n/a            | n/a        | 194            | 136        | TrN+G   | TIM+I+G | GTR+I+G        | TIM+I+G              |
| Total                    | <b>1,515</b>    | n/a            | n/a        | <b>248</b>     | <b>169</b> | n/a     | n/a     | n/a            | n/a                  |

"Model" columns indicate the models of sequence evolution implemented in the Bayesian and likelihood analyses. The global dataset consists of nuclear and mitochondrial DNA sequence data for 84 *Mycocepurus* ingroup taxa and 87 attine and myrmicine outgroup taxa. The local dataset consists exclusively of mitochondrial sequence data for 41 *M. smithii* individuals. PI, parsimony-informative.

**Table S7. Microsatellite loci developed for the fungus-gardening ant species *M. smithii***

| Locus | Repeat motif                                                   | Primer (5'-3')                                         | T <sub>m</sub> (°C) | Multiple × | Dye | Size range | Number of alleles | GenBank accession number |
|-------|----------------------------------------------------------------|--------------------------------------------------------|---------------------|------------|-----|------------|-------------------|--------------------------|
| A5    | (AC) <sub>14</sub>                                             | F: GAACTTCGACGTGTAATTCG<br>R: GCCACGGATAATTCGAT        | 56–57               | B          | FAM | 238–256    | 12                | JN055219                 |
| A6    | (AC) <sub>15</sub>                                             | F: CTCCTCCGGCTTTTCTCT<br>R: GATCGCGTACGGGTATATG        | 56–57               | C          | FAM | 101–123    | 12                | JN055220                 |
| A9    | (GT) <sub>13</sub>                                             | F: AACCTTCCCTTTGCGAAT<br>R: TATGTTTTGTGCCGTCGTTA       | 56–57               | A          | FAM | 135–165    | 10                | JN055221                 |
| B1    | (TC) <sub>17</sub>                                             | F: GTGAGACGTGTTTCGACGAG<br>R: GACTCGGAACCGACTTTCT      | 56–58               | D          | HEX | 90–132     | 15                | JN055222                 |
| B4    | (GC) <sub>8</sub>                                              | F: GATTTGCATACGTCTGTCTAGC<br>R: GCCTATTTCTGTGAAGGTAATG | 56–57               | D          | FAM | 205–207    | 2                 | JN055223                 |
| C2    | (TTG) <sub>6</sub> -A-(TTG) <sub>5</sub>                       | F: CGCGTGATTCTAGACAAC<br>R: AACGTGAGTCAGAACAATACG      | 56–57               | D          | FAM | 230–242    | 5                 | JN055224                 |
| C6    | (TTG) <sub>6</sub> -TTA-(TTG) <sub>4</sub>                     | F: ACCAGGTTACAGGCGTAGAT<br>R: CGATACCATCACCACGACTA     | 56–57               | B          | HEX | 237–271    | 11                | JN055225                 |
| C104  | (CAA) <sub>8</sub>                                             | F: CGTCTACCAAGTTCTGATTGC<br>R: ATCTGACATTTTGTCCAACG    | 56–57               | C          | FAM | 204–225    | 8                 | JN055226                 |
| C119  | (CAG) <sub>4</sub> -(CAA) <sub>8</sub> -<br>(ATC) <sub>3</sub> | F: CGATTCTACATCGATTCTGCR<br>R: ATCTGACATTTTGTCCAACG    | 56–57               | B          | FAM | 111–135    | 9                 | JN055227                 |
| D8    | (CAT) <sub>11</sub> -(CGT) <sub>5</sub>                        | F: CGGACATGTTCTTCGAGAT<br>R: CGCGACCTTTGAAAGTAGAT      | 56–57               | D          | HEX | 159–189    | 10                | JN055228                 |
| D11   | (GAT) <sub>10</sub> -GAC-(GAT) <sub>4</sub>                    | F: ACTTCGTTCCATCTTCC<br>R: CGCATCATCAGTTTGTTCAC        | 56–57               | C          | FAM | 285–294    | 4                 | JN055229                 |
| D117  | (TCA) <sub>27</sub>                                            | F: GATGTCATAGCAGGGCATTAA<br>R: TGTCGCGTTGTGTCTAT       | 56–57               | A          | FAM | 196–242    | 8                 | JN055230                 |

T<sub>m</sub> is the optimal annealing temperature. Loci were amplified in four multiplexed PCR reactions (A–D). The number of alleles and the size range were determined from genotyping 1,930 individuals from 39 localities in Latin America. Clone sequences were deposited in GenBank under the accession numbers given. F, forward; R, reverse. HEX, hexachlorofluorescein; FAM, carboxyfluorescein.

**Table S8. Primers used for PCR amplification and DNA sequencing**

| Primer                | Sequence (5'-3')           | Position                   | Source                |
|-----------------------|----------------------------|----------------------------|-----------------------|
| EF1- $\alpha$ F1 copy |                            |                            |                       |
| F1-494F               | AAGGAGGCTCAGGAGATGGG       | <i>Apis</i> 494–513        | (31)                  |
| F1-1044R              | CGTCTTACCATCGGCATTGCC      | <i>Apis</i> 1044–1019      | (31)                  |
| F1-792F               | TTGGCGTGAAGCAGCTGATCG      | <i>Apis</i> 792–812        | (31)                  |
| F1-1189R              | ACCTGGTTTYAAGATRCCGGT      | <i>Apis</i> 1189–1169      | (31)                  |
| F1-1109F              | CCGCTTCAGGATGTCTATAA       | <i>Apis</i> 1109–1128      | (31)                  |
| F1-1551R              | CCGCGTCTCAGTTYCTTTAC       | <i>Apis</i> 1551–1532      | (31)                  |
| F1-1424F              | GCGCCKGCGGCTCTACCACCAGG    | <i>Apis</i> 1424–1448      | (55)                  |
| F1-1829R              | GGAAGGCCTCGACGCACATMGG     | <i>Apis</i> 1829–1808      | (55)                  |
| Wg                    |                            |                            |                       |
| MycoWg578F            | TGCACGGTGAAGACTTGCTGGATGCG | <i>Pheidole</i> 578–603    | Modified from ref. 58 |
| Wg1032R               | ACYTCGCAGCACCATRGAA        | <i>Pheidole</i> 1032–1013  | (59)                  |
| LW Rh                 |                            |                            |                       |
| LR143F                | ACAAAGTGCCACCGGAGATGCT     | <i>Apis</i> 144–165        | Modified from ref. 58 |
| MycoLR639ER           | CTTACCGGTTCCATCCGAACA      | <i>Apis</i> ~639–624       | Modified from ref. 58 |
| COI-II                |                            |                            |                       |
| LCO1490               | GGTCAACAAATCATAAAGATATTGG  | <i>D. yakuba</i> 1490–1515 | (60)                  |
| HCO2198               | TGATTTTTGGTCAACCTGAAGTTTA  | <i>D. yakuba</i> 2198–2223 | (60)                  |
| CI13                  | ATAATTTTTTTATAGTTATAACC    | <i>Apis</i> 2002–2025      | (61)                  |
| CI14                  | ATTTCTTTTTTCTCTTTC         | <i>Apis</i> 2549–2568      | (61)                  |
| MycoJerry             | CAACAYYATTTTGAATTTTGG      | <i>Apis</i> ~2181–2203     | Modified from ref. 57 |
| MycoBen               | CAYGAYACHTATTATGTAGTRGC    | <i>Apis</i> ~2613–2591     | Modified from ref. 62 |
| MycoGeorge            | ATACCTCGTCGATATTCTGA       | <i>D. yakuba</i> 2773–2792 | Modified from ref. 63 |
| Marilyn               | TCATAAGTTCARTATCATTG       | <i>D. yakuba</i> 3364–3383 | (63)                  |
| Lewis                 | TATTATTTGARGARTCCCTCT      | <i>Apis</i> ~2660–2679     | This study            |

Position numbers correspond to *Apis mellifera* GenBank accession number X52884 (EF1- $\alpha$ F1), *Pheidole morrisi* GenBank accession number AY101369.1 (Wg), *A. mellifera* GenBank accession number U26026 (LW Rh), *Drosophila yakuba* GenBank accession number X03240 (COI and COII), and the *A. mellifera* nucleotide position given in ref. 57 (COI). For all genes, the PCR product was amplified directly from the DNA extract.
